# Supplementary material for: Complexation Behavior of Pinene–Bipyridine Ligands towards Lanthanides: The Influence of the Carboxylic Arm
Source: MDPI journal article supplement (doi:10.3390/chemistry4010002), 2021-12-31
Supplement: s1 [file s1]

# Complexation Behavior of Pinene–Bipyridine Ligands towards Lanthanides: The Influence of the Carboxylic Arm

Atena B. Solea <sup>1,2</sup>, Liangru Yang <sup>3</sup>, Aurelien Crochet <sup>2</sup>, Katharina M. Fromm <sup>2</sup>, Christophe Allemann <sup>1</sup> and Olimpia Mamula <sup>1,\*</sup>

<sup>1</sup> Haute Ecole d'Ingénierie et d'Architecture Fribourg, HEIA-FR, HES-SO, University of Applied Sciences of Western Switzerland, Pérolles 80, CH-1705 Fribourg, Switzerland; Atena.Solea@warwick.ac.uk (A.B.S.); Christophe.Allemann@hefr.ch (C.A.)

<sup>2</sup> Department of Chemistry, University of Fribourg, Chemin du Musée 9, CH-1700 Fribourg, Switzerland; aurelien.crochet@unifr.ch (A.C.); katharina.fromm@unifr.ch (K.M.F.)

<sup>3</sup> School of Chemistry & Chemical Engineering, Henan University of Technology, Zhengzhou 450001, China; lryang@haut.edu.cn

\* Correspondence: [olimpia.mamulasteiner@hefr.ch](mailto:olimpia.mamulasteiner@hefr.ch)

## Contents

|                          |    |
|--------------------------|----|
| NMR spectra.....         | 3  |
| (+)-ESI-MS spectra ..... | 9  |
| HRMS spectra.....        | 15 |
| X-Ray tables.....        | 24 |

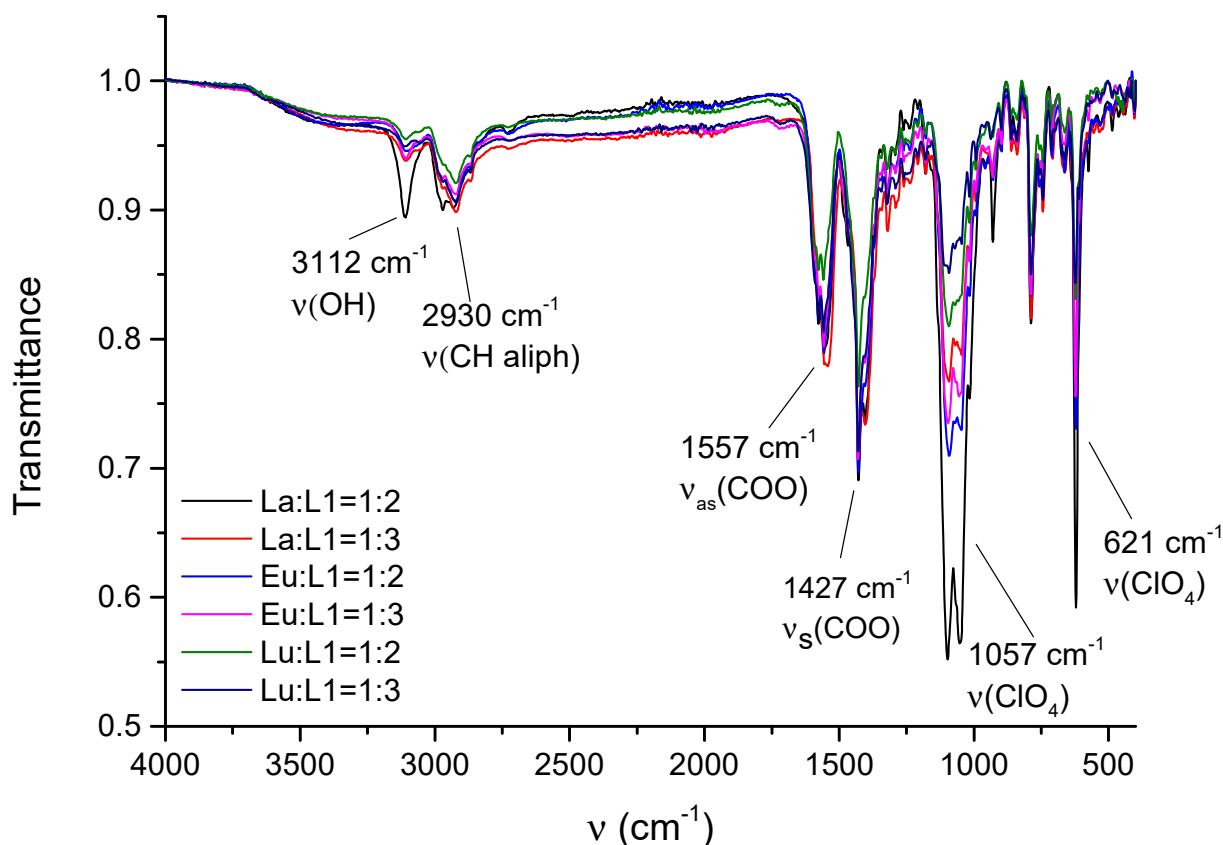

**Figure S1.** Superposition of IR spectra of complexes with (-)-L1<sup>+</sup>.

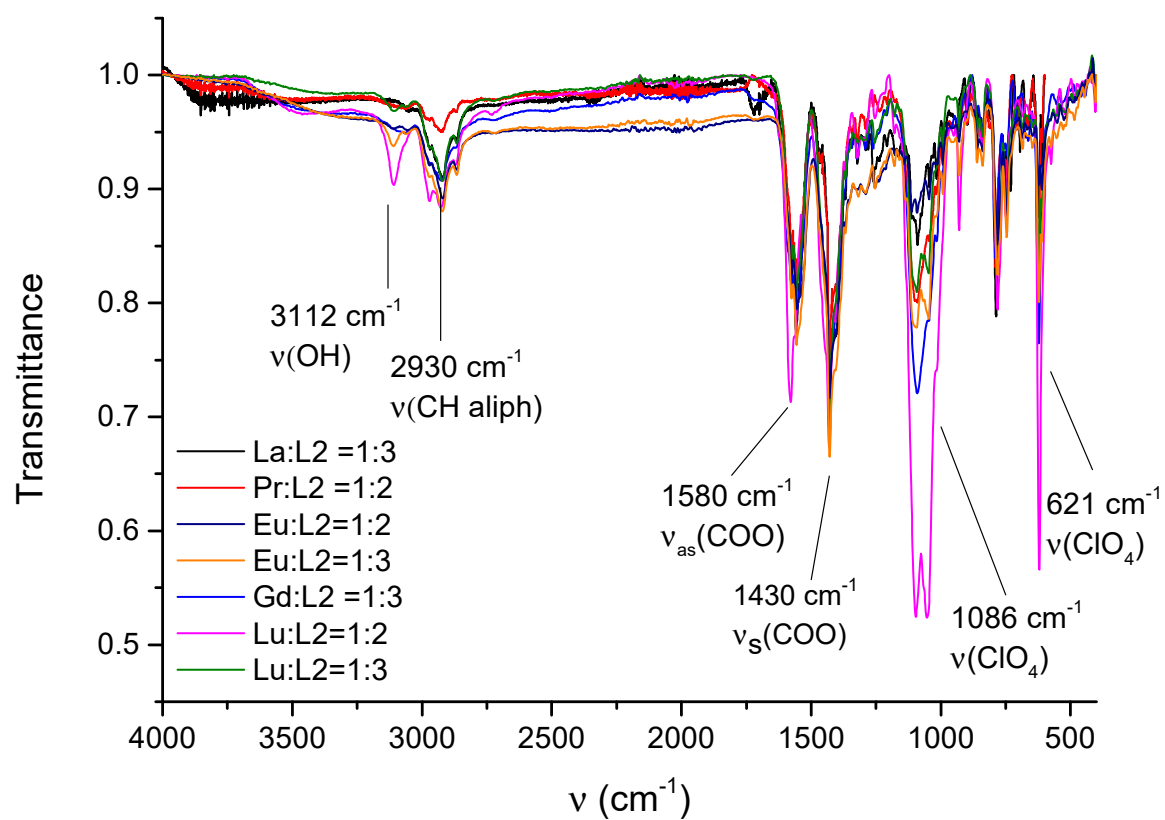

**Figure S2.** Superposition of IR spectra of complexes with (-)-L2<sup>+</sup>.

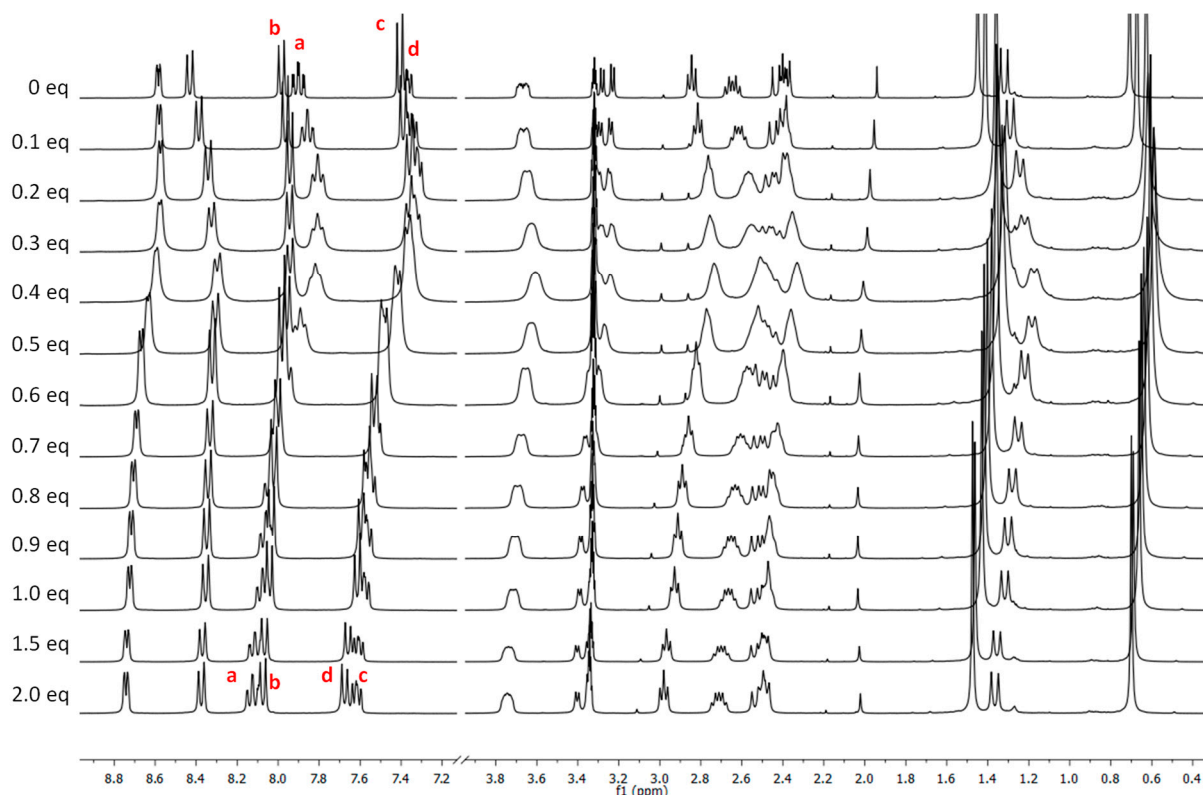

**Figure S3.** <sup>1</sup>H-NMR titration of (-)-L1<sup>+</sup> with La(III) in MeOD.

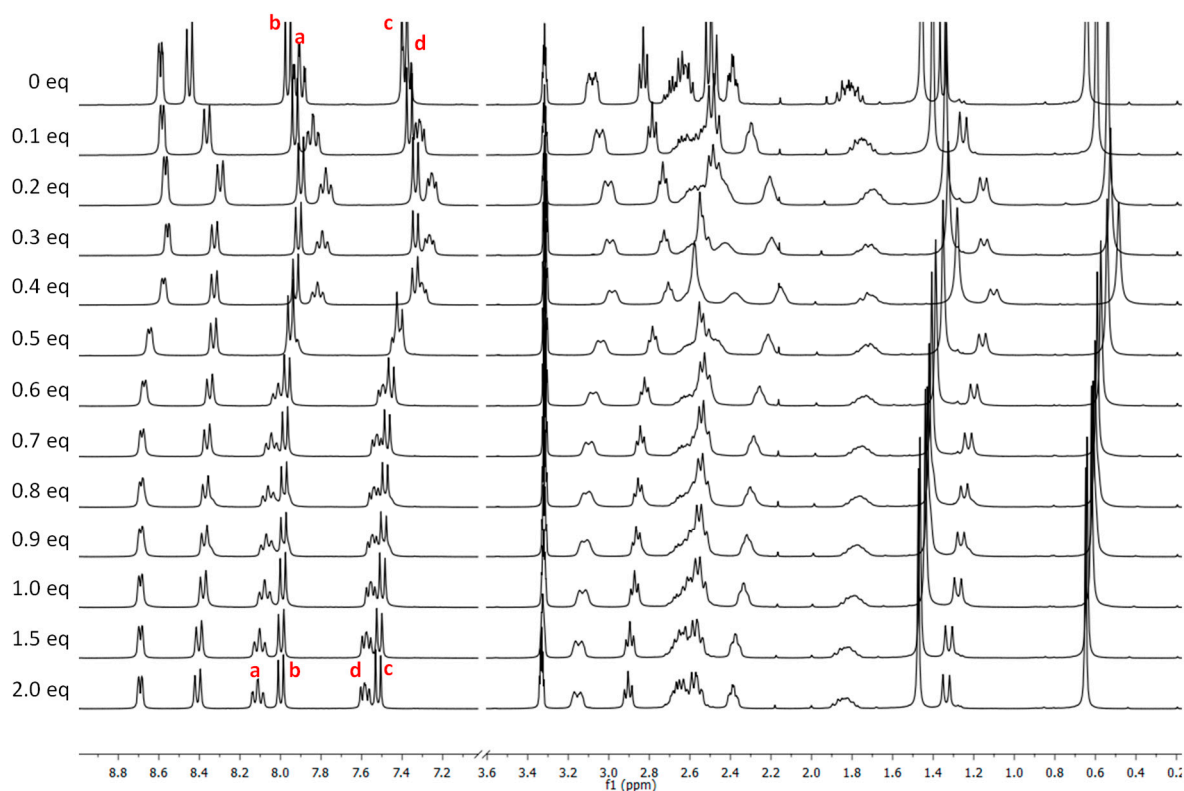

Figure S4.  $^1\text{H}$ -NMR titration of (-)-L2 with La(III) in MeOD.

### NMR spectra

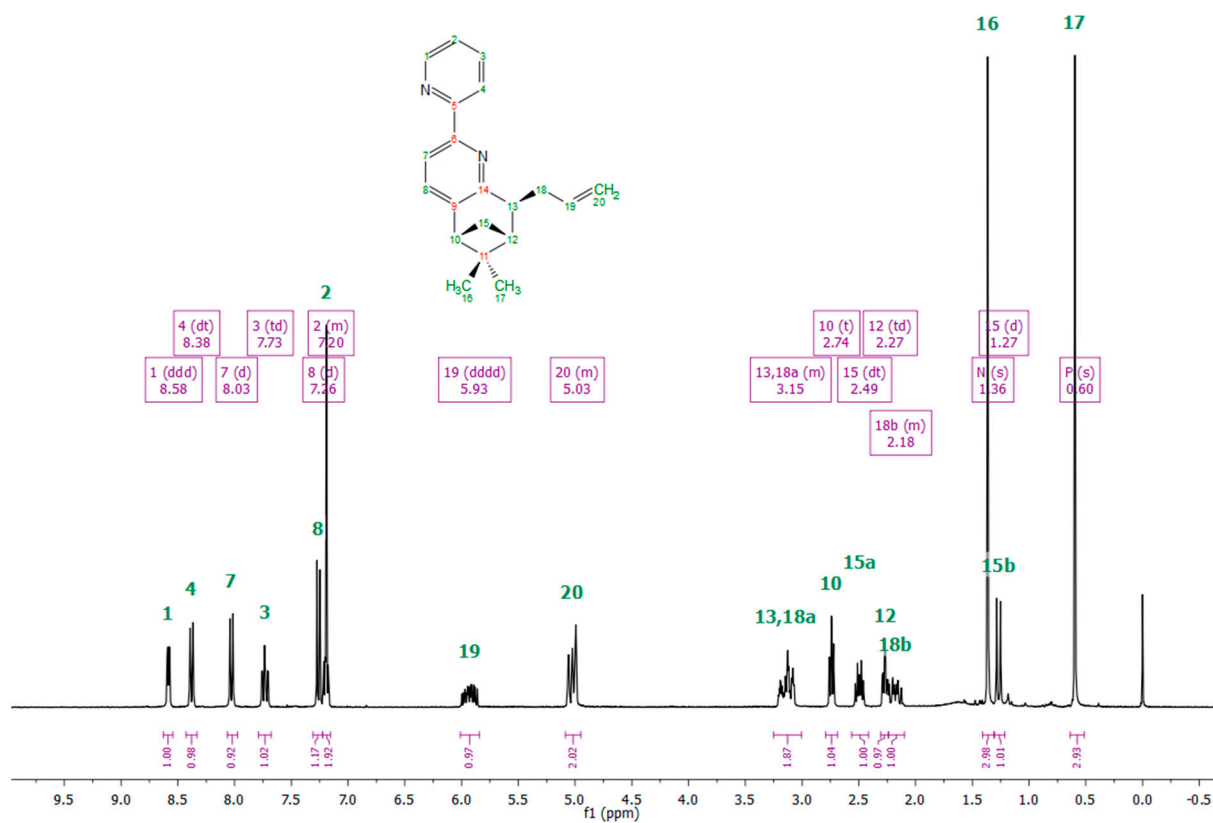

Figure S5.  $^1\text{H}$ -NMR spectrum of (-)-PL1.

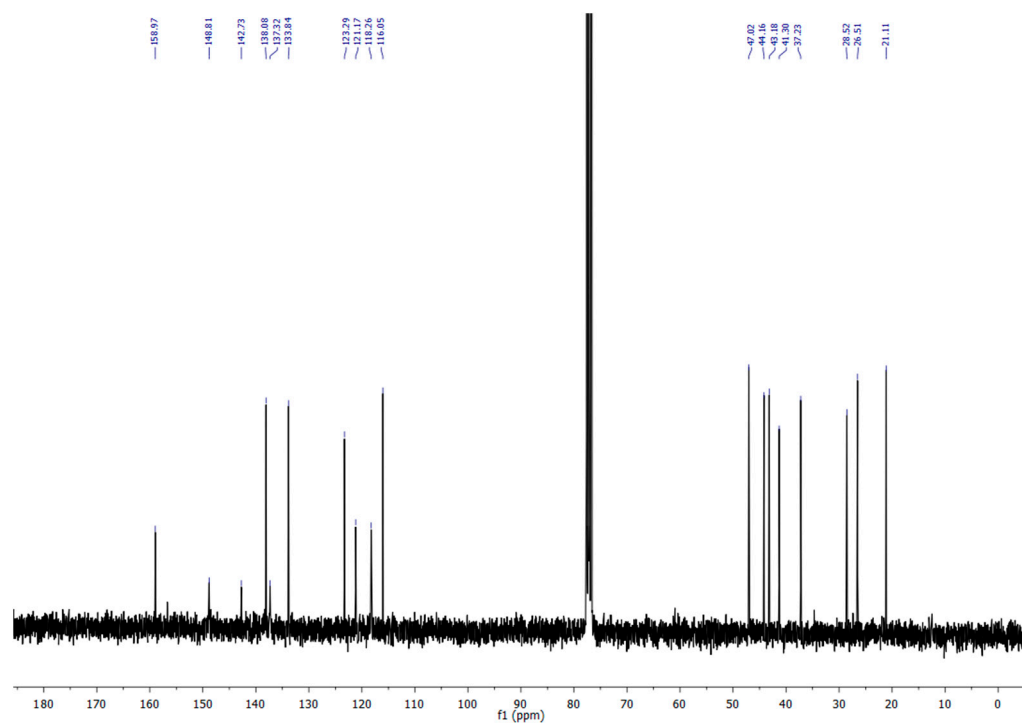

Figure S6.  $^{13}\text{C}$ -NMR spectrum of (-)-PL1.

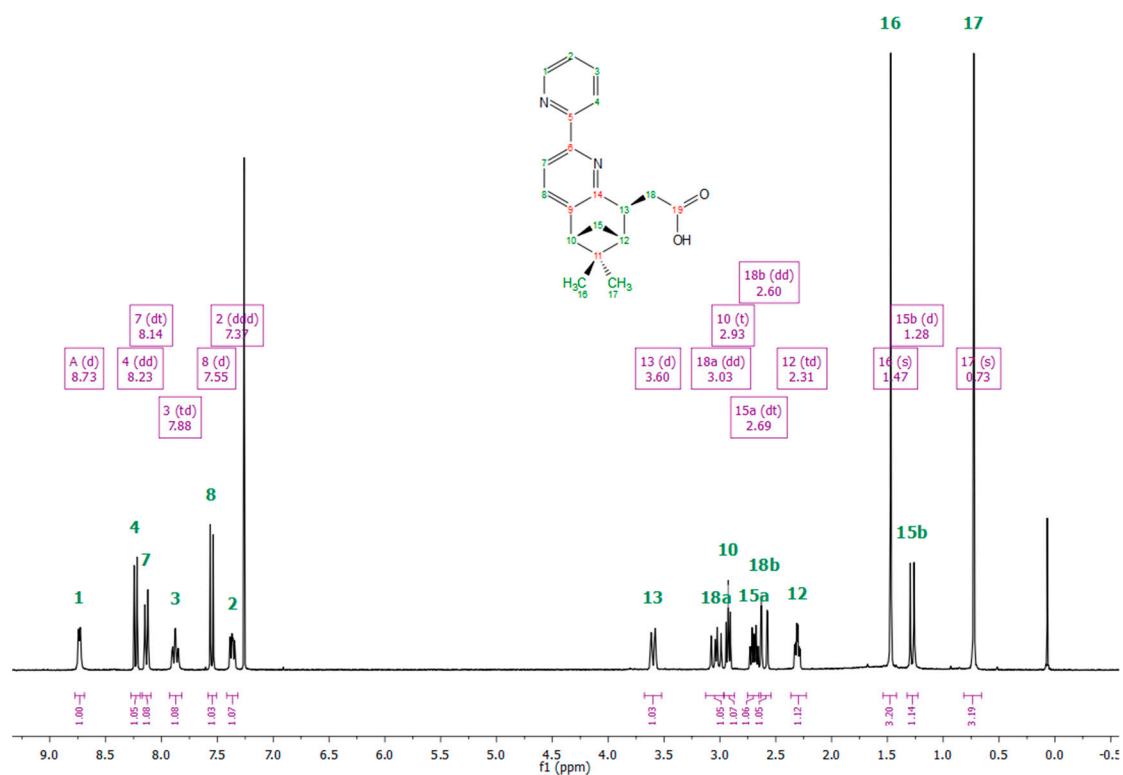

Figure S7.  $^1\text{H}$ -NMR spectrum of (-)-HL1.

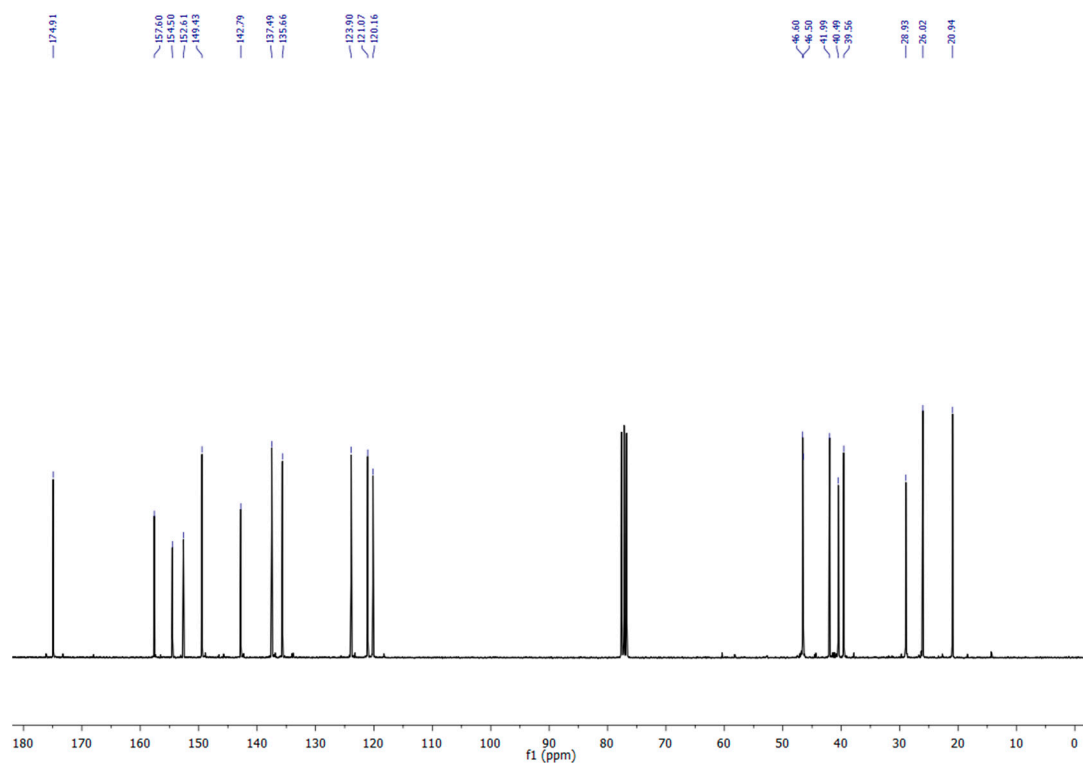

Figure S8.  $^{13}\text{C}$ -NMR spectrum of (-)-HL1.

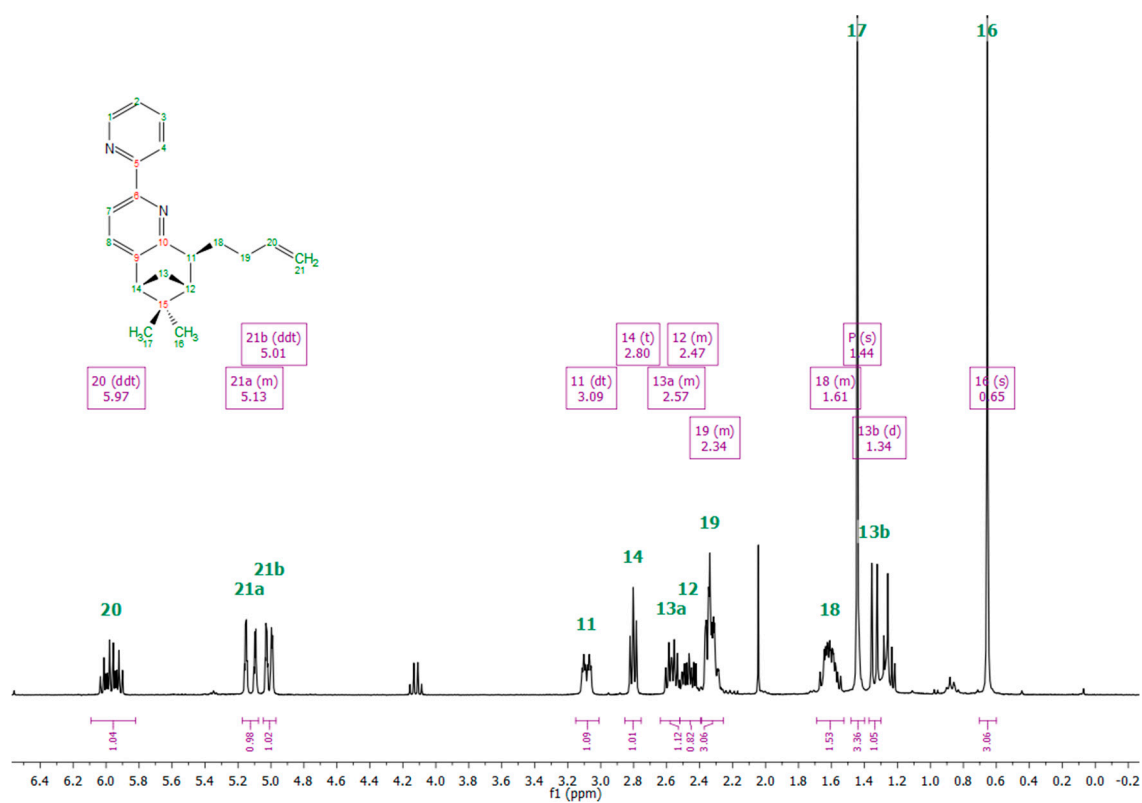

Figure S9.  $^1\text{H}$ -NMR spectrum of (-)-PL2.

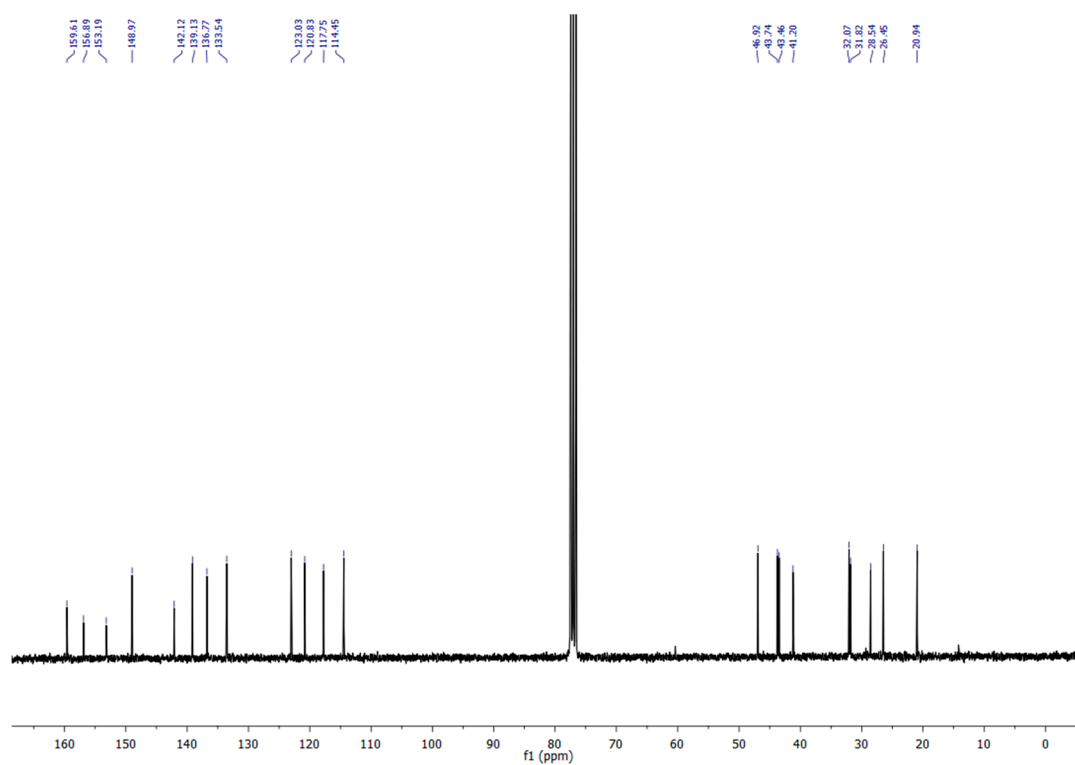

Figure S10.  $^{13}\text{C}$ -NMR spectrum of (-)-PL2.

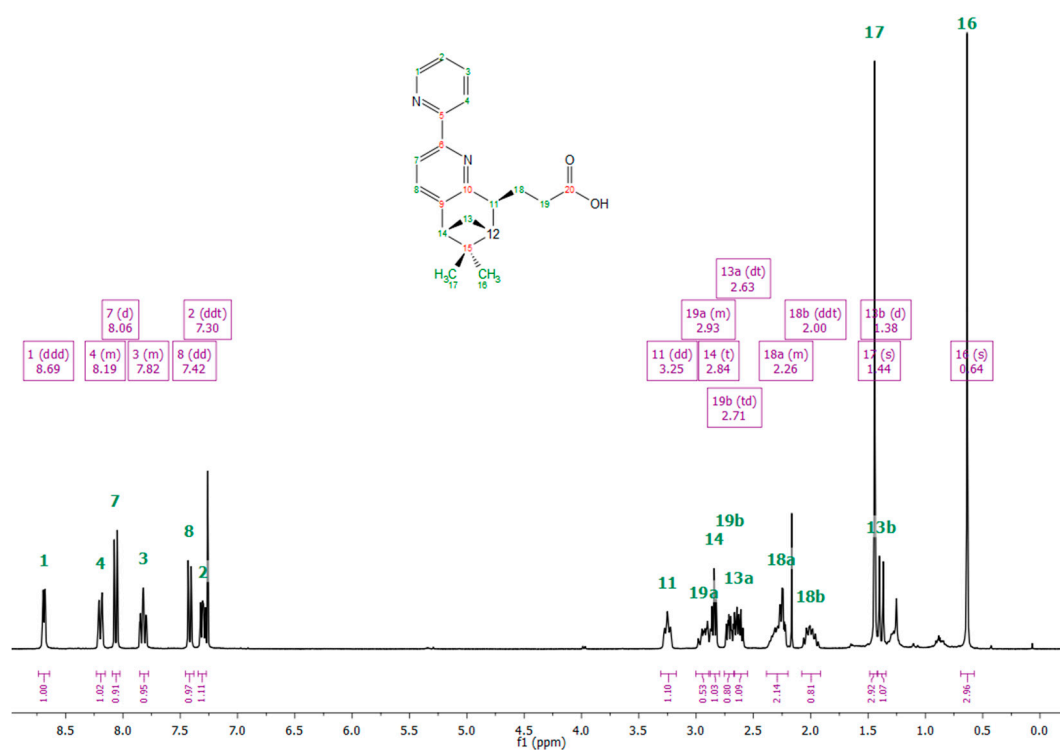

Figure S11.  $^1\text{H}$ -NMR spectrum of (-)-HL2.

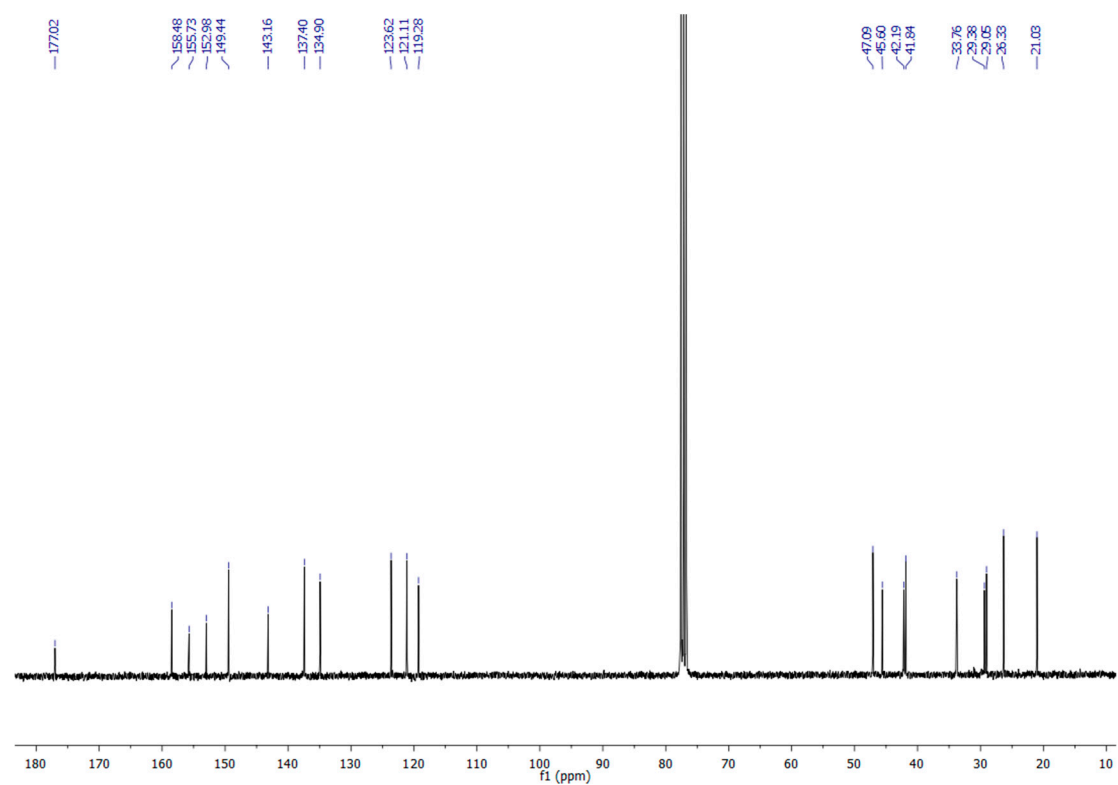

**Figure S12.**  $^{13}\text{C}$ -NMR spectrum of (-)-HL2.

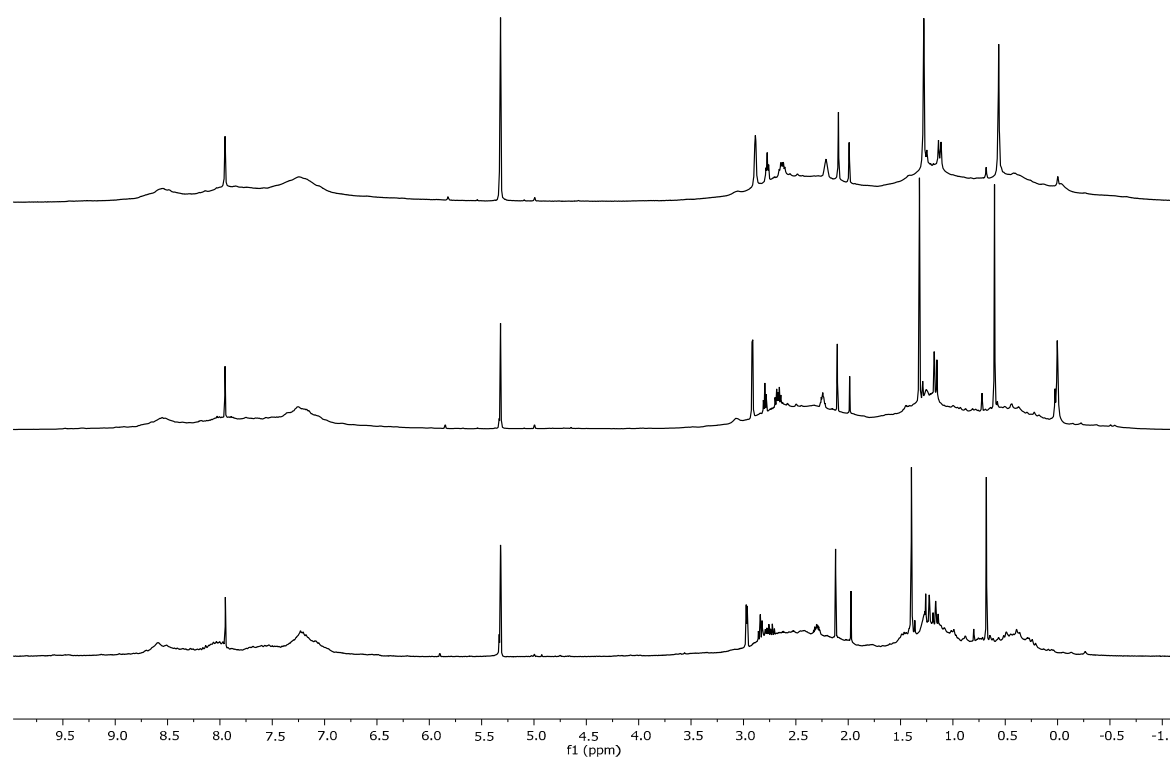

**Figure S13.** Stacked  $^1\text{H}$ -NMR spectra of  $[\text{La}\{(-)\text{-L2}\}_2]\text{ClO}_4$  in  $\text{CD}_2\text{Cl}_2$  at 298 K (top), 233 K (middle) and 183 K (bottom).

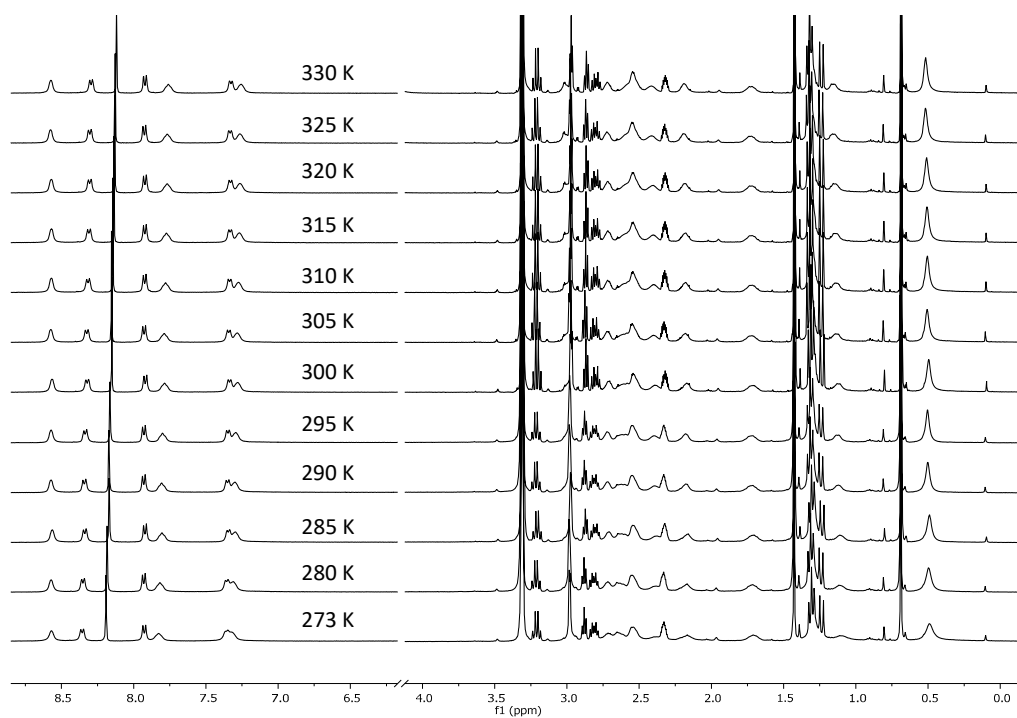

**Figure S14.** Stacked  $^1\text{H}$ -NMR spectra of  $[\text{La}\{(-)\text{-L1}\}_2]\text{ClO}_4$  in  $\text{MeOD}$ .

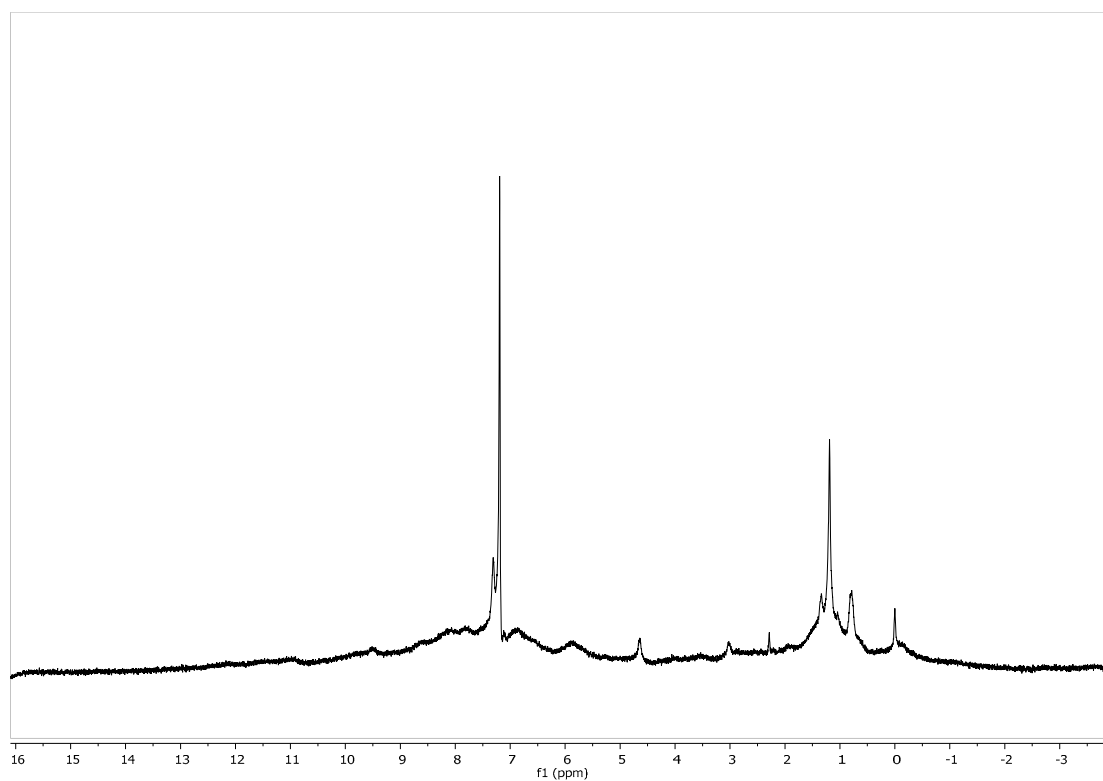

**Figure S15.**  $^1\text{H}$ -NMR spectrum of  $[\text{Eu}\{(-)\text{-L1}\}_2]\text{ClO}_4$  in  $\text{CDCl}_3$ .

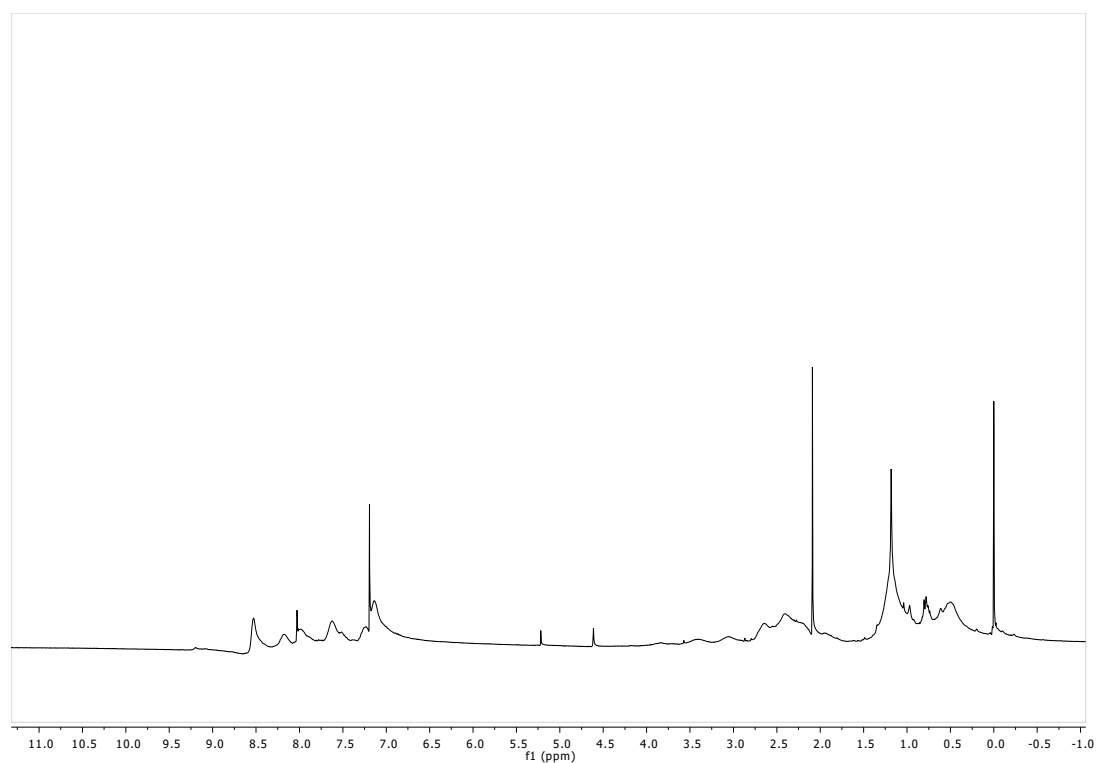

**Figure S16.**  $^1\text{H}$ -NMR spectrum of  $[\text{Lu}\{(-)\text{-L1}\}_2]\text{ClO}_4$  in  $\text{CDCl}_3$ .

**(+)-ESI-MS spectra**

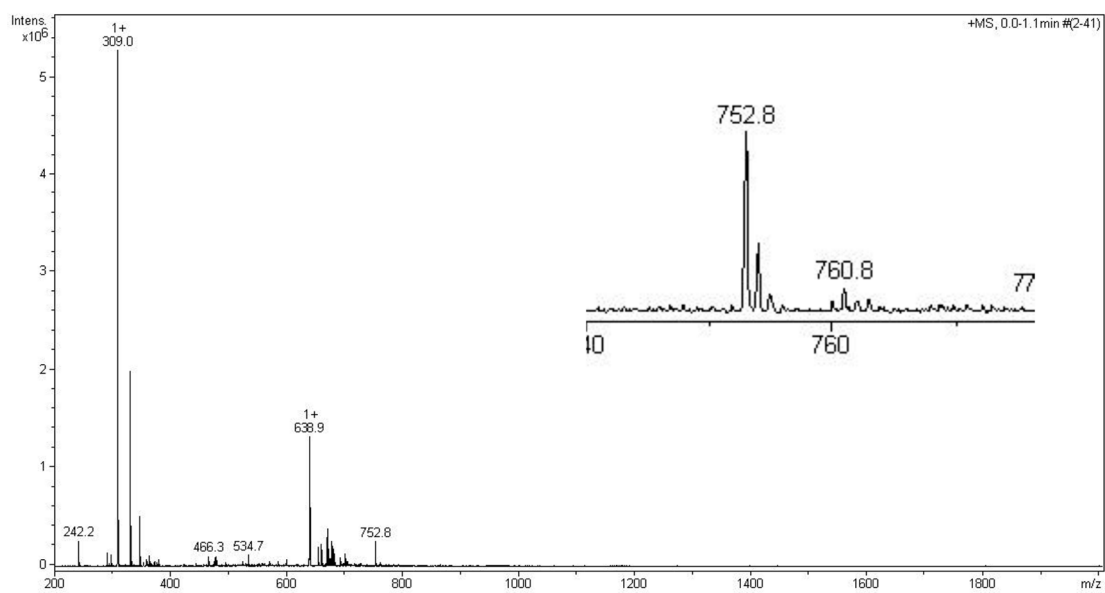

**Figure S17.** (+)-ESI-MS spectrum of the complex formed at  $\text{La}:\text{L1} = 1:2$  ratio.

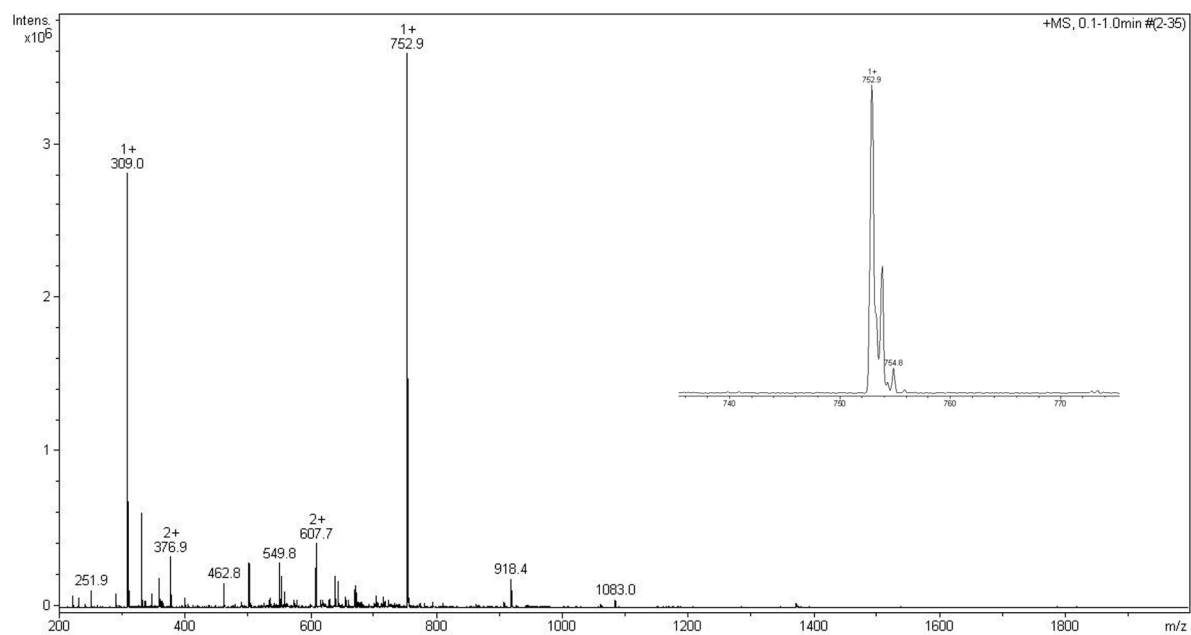

**Figure S18.** (+)-ESI-MS spectrum of the complex formed at La:L1 = 1:3 ratio.

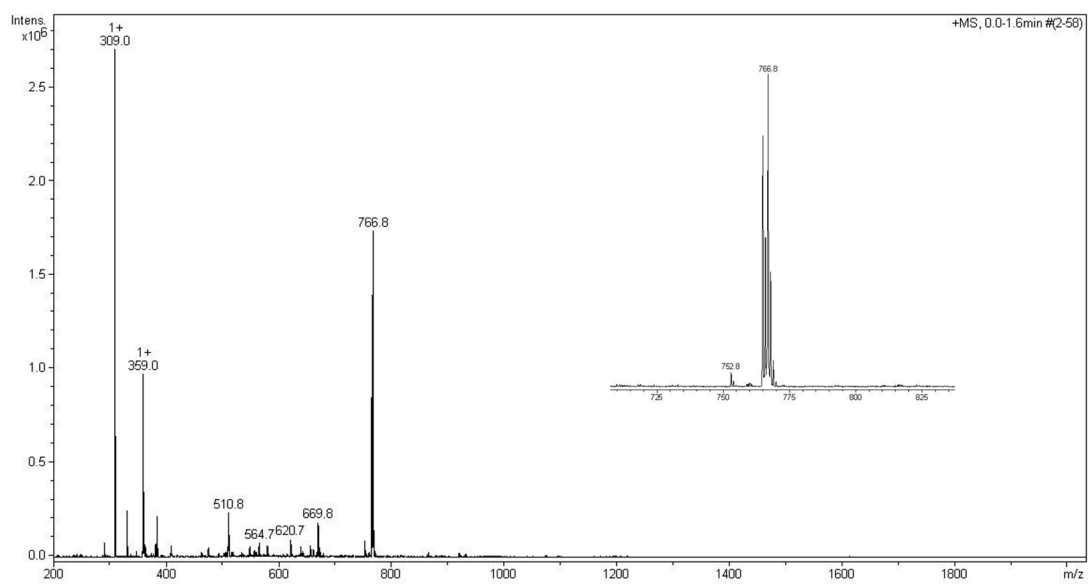

**Figure S19.** (+)-ESI-MS spectrum of the complex formed at Eu:L1 = 1:2 ratio.

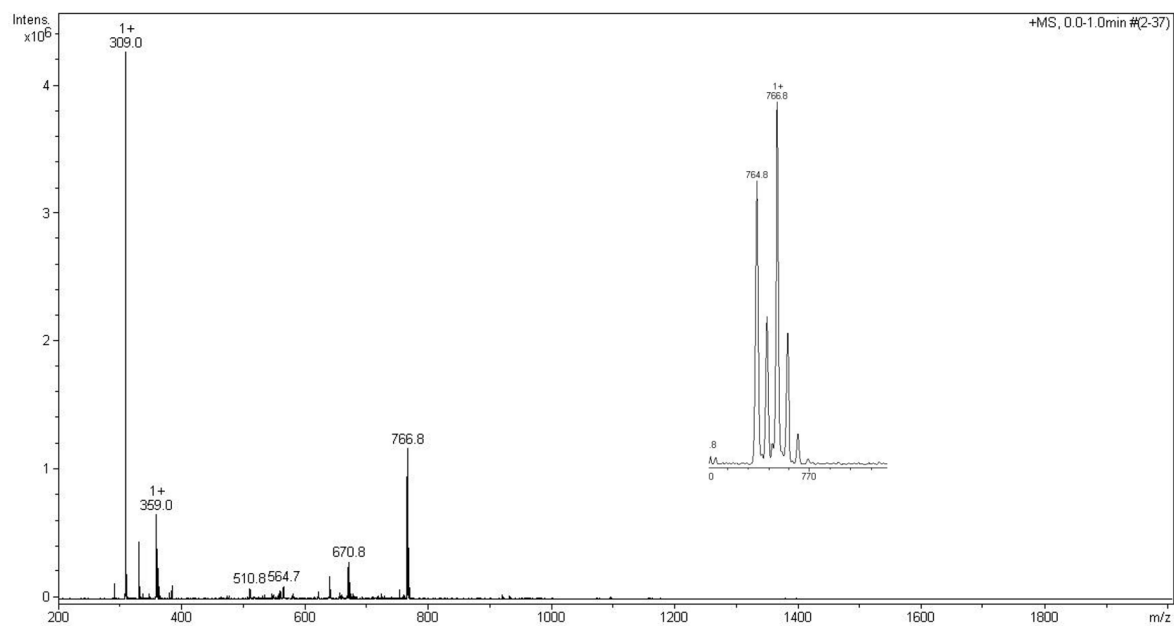

**Figure S20.** (+)-ESI-MS spectrum of the complex formed at Eu:L1 = 1:3 ratio

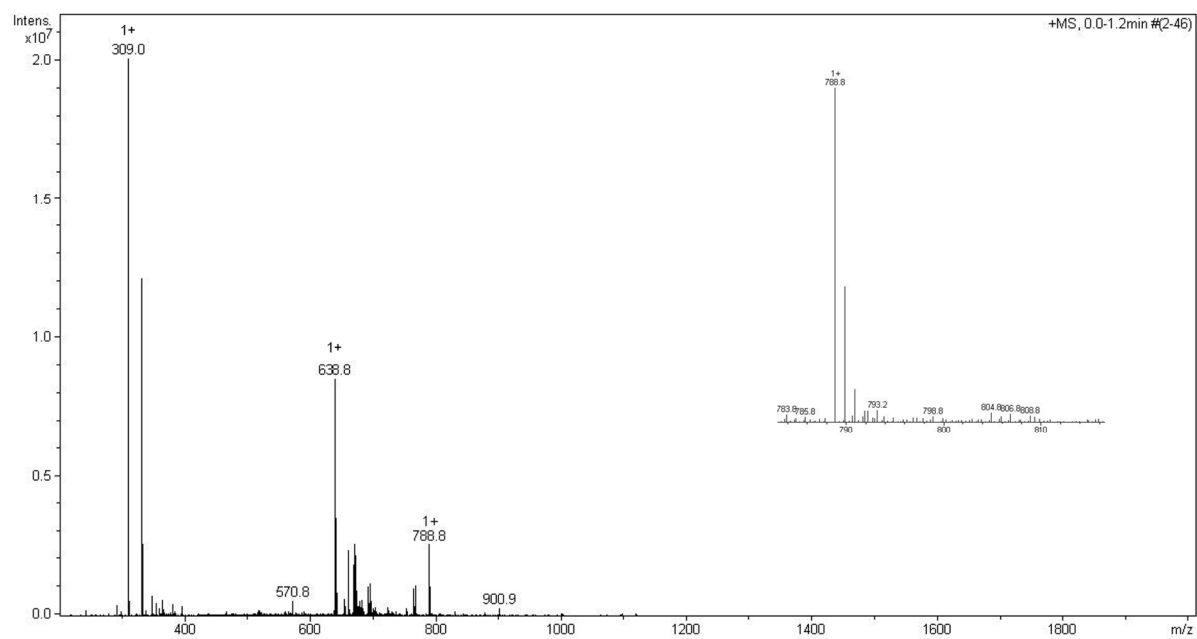

**Figure S21.** (+)-ESI-MS spectrum of the complex formed at Lu:L1 = 1:2 ratio.

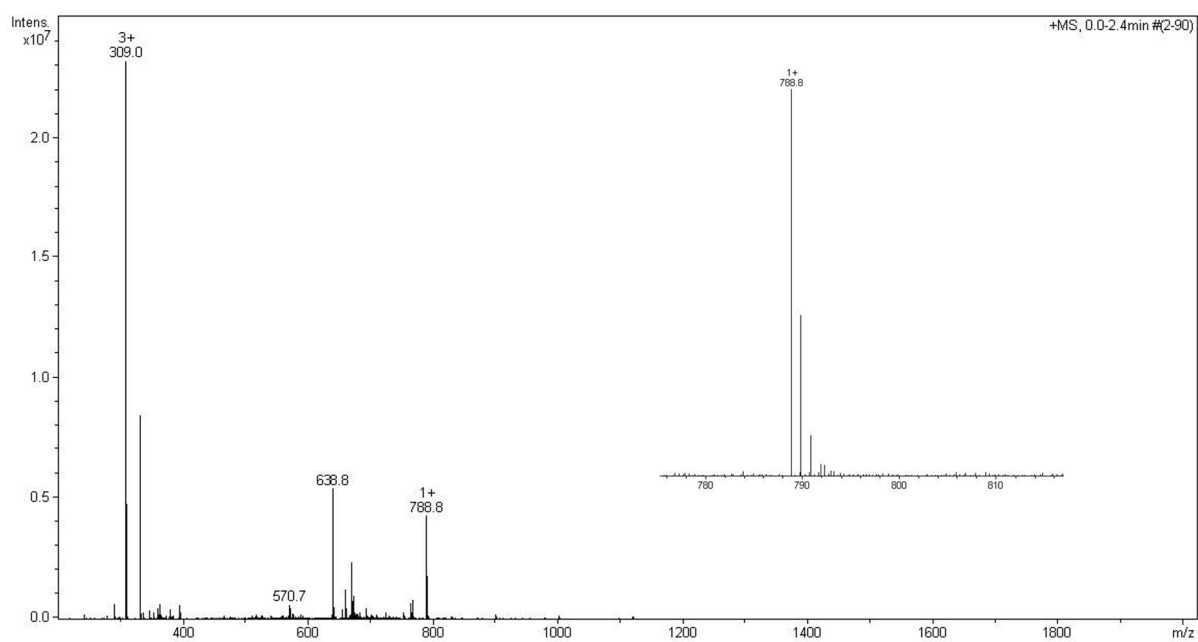

**Figure S22.** (+)-ESI-MS spectrum of the complex formed at Lu:L1 = 1:3 ratio.

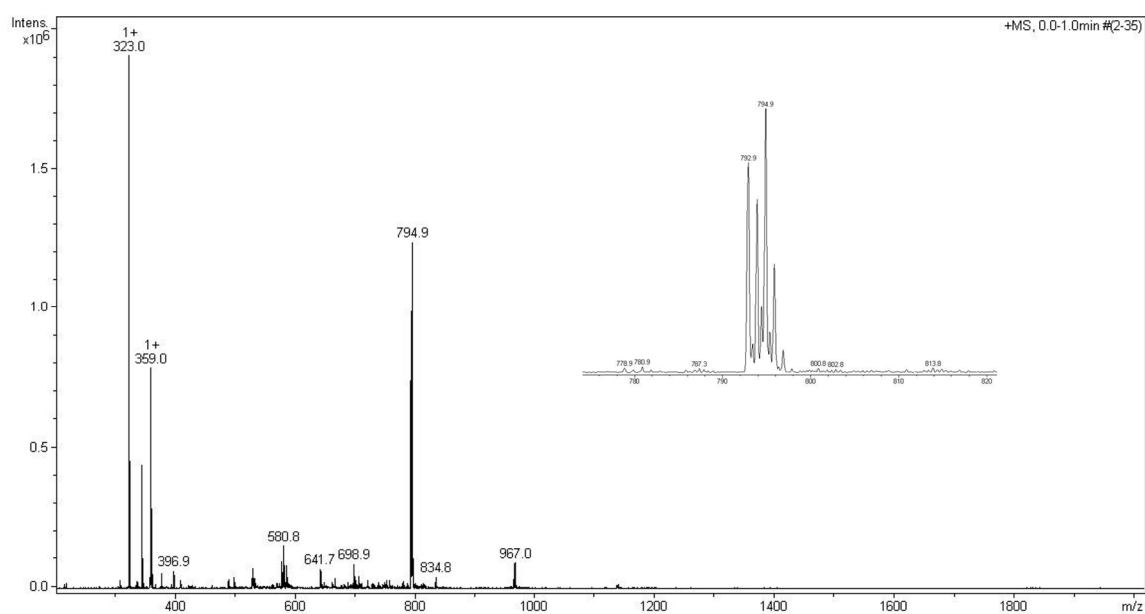

**Figure S23.** (+)-ESI-MS spectrum of the complex formed at Eu:L2 = 1:2 ratio.

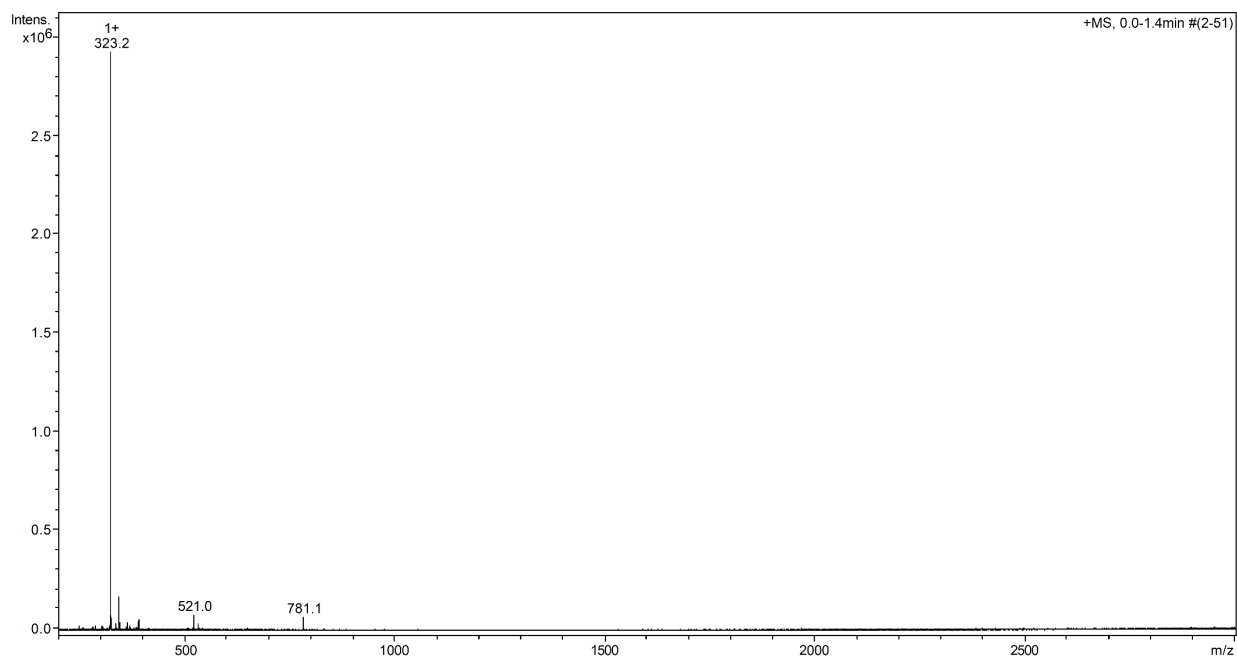

**Figure S24.** (+)-ESI-MS spectrum of the complex formed at La:L2 = 1:2 ratio.

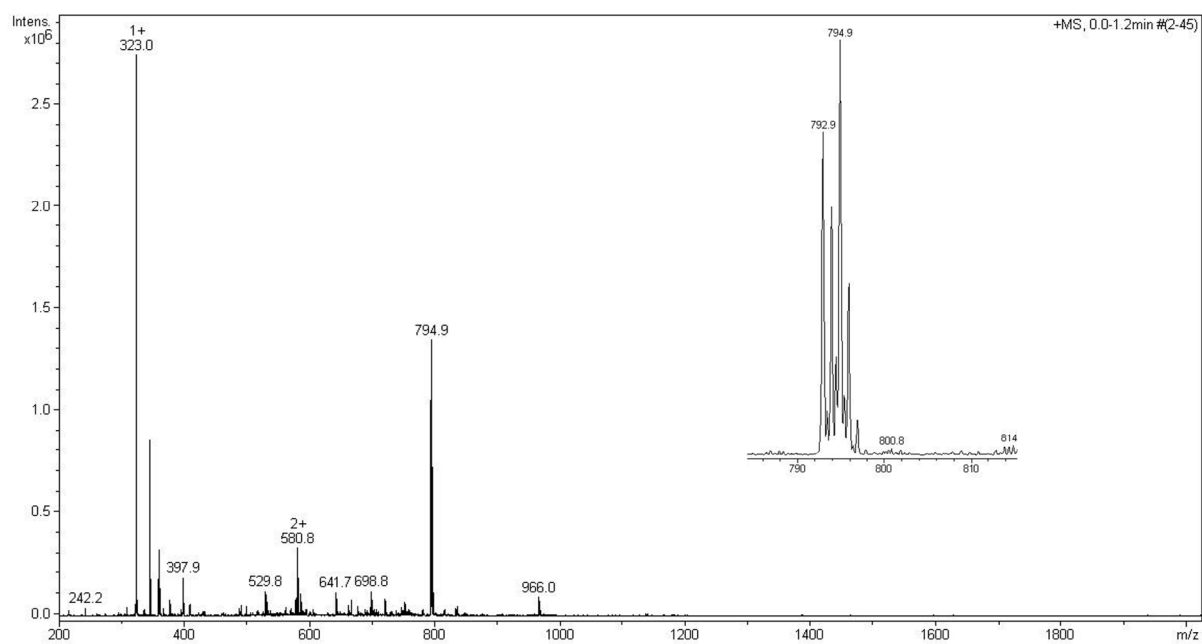

**Figure S25.** (+)-ESI-MS spectrum of the complex formed at Eu:L2 = 1:3 ratio.

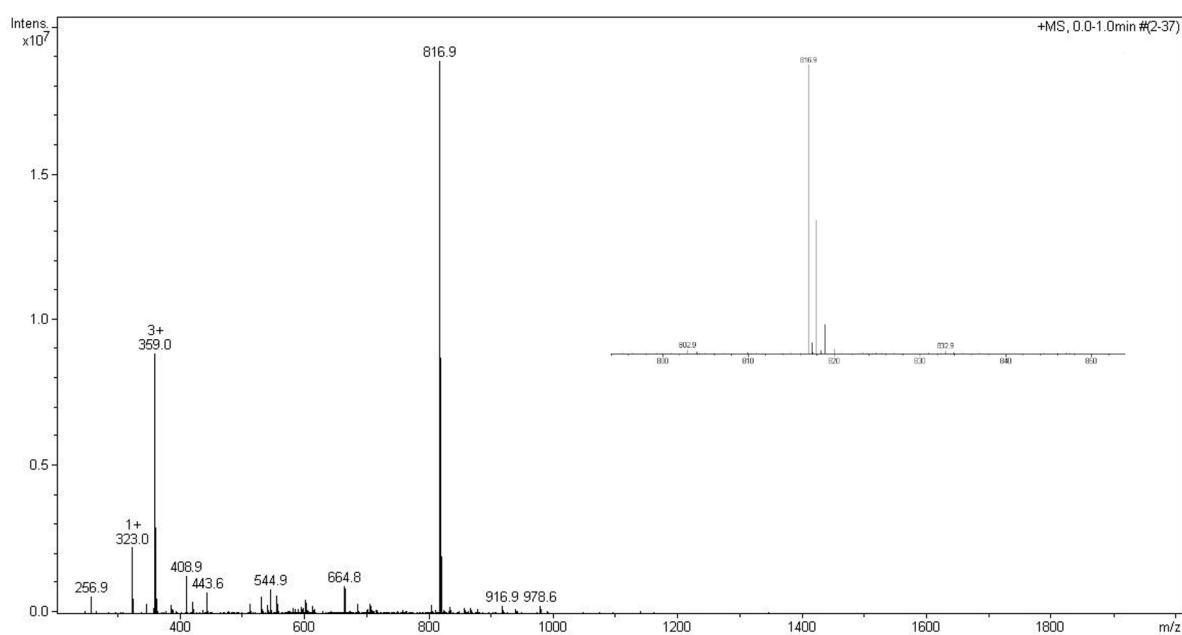

Figure S26. (+)-ESI-MS spectrum of the complex formed at Lu:L2 = 1:2 ratio.

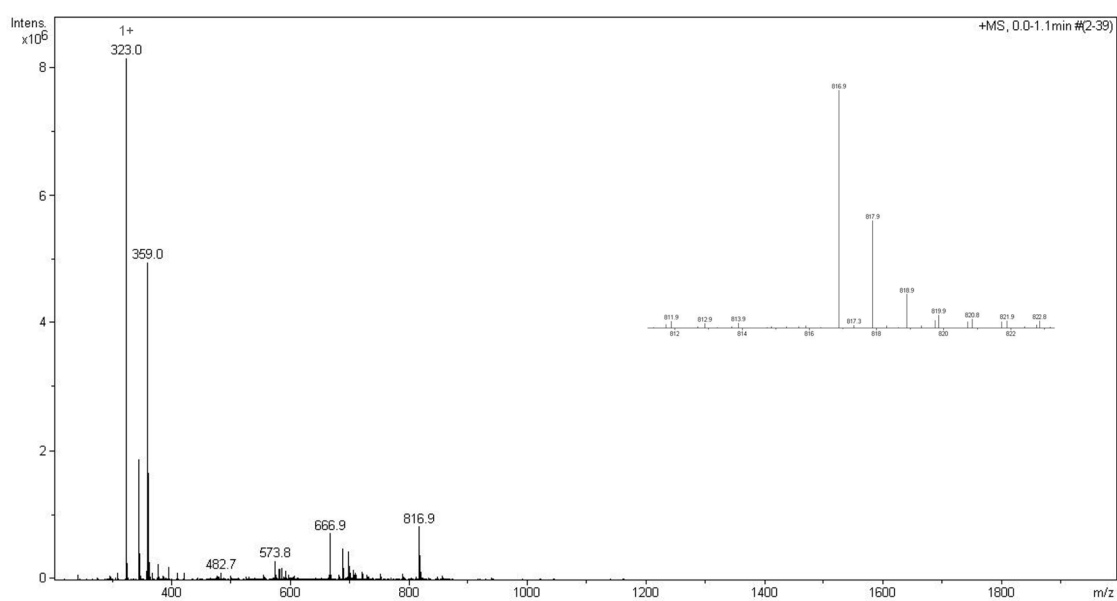

Figure S27. (+)-ESI-MS spectrum of the complex formed at Lu:L2 = 1:3 ratio.

# HRMS spectra

## (-)-PL1

| Mass     | Calc. Mass | mDa   | PPM    | DBE  | Formula    |
|----------|------------|-------|--------|------|------------|
| 291.1904 | 291.1861   | 4.3   | 14.8   | 10.5 | C20 H23 N2 |
|          | 291.1610   | 29.4  | 101.0  | 11.5 | C18 H19 N4 |
|          | 291.2549   | -64.5 | -221.5 | 4.5  | C17 H31 N4 |
|          | 291.2800   | -89.6 | -307.7 | 3.5  | C19 H35 N2 |
|          | 291.0922   | 98.2  | 337.2  | 17.5 | C21 H11 N2 |
|          | 291.0671   | 123.3 | 423.4  | 18.5 | C19 H7 N4  |

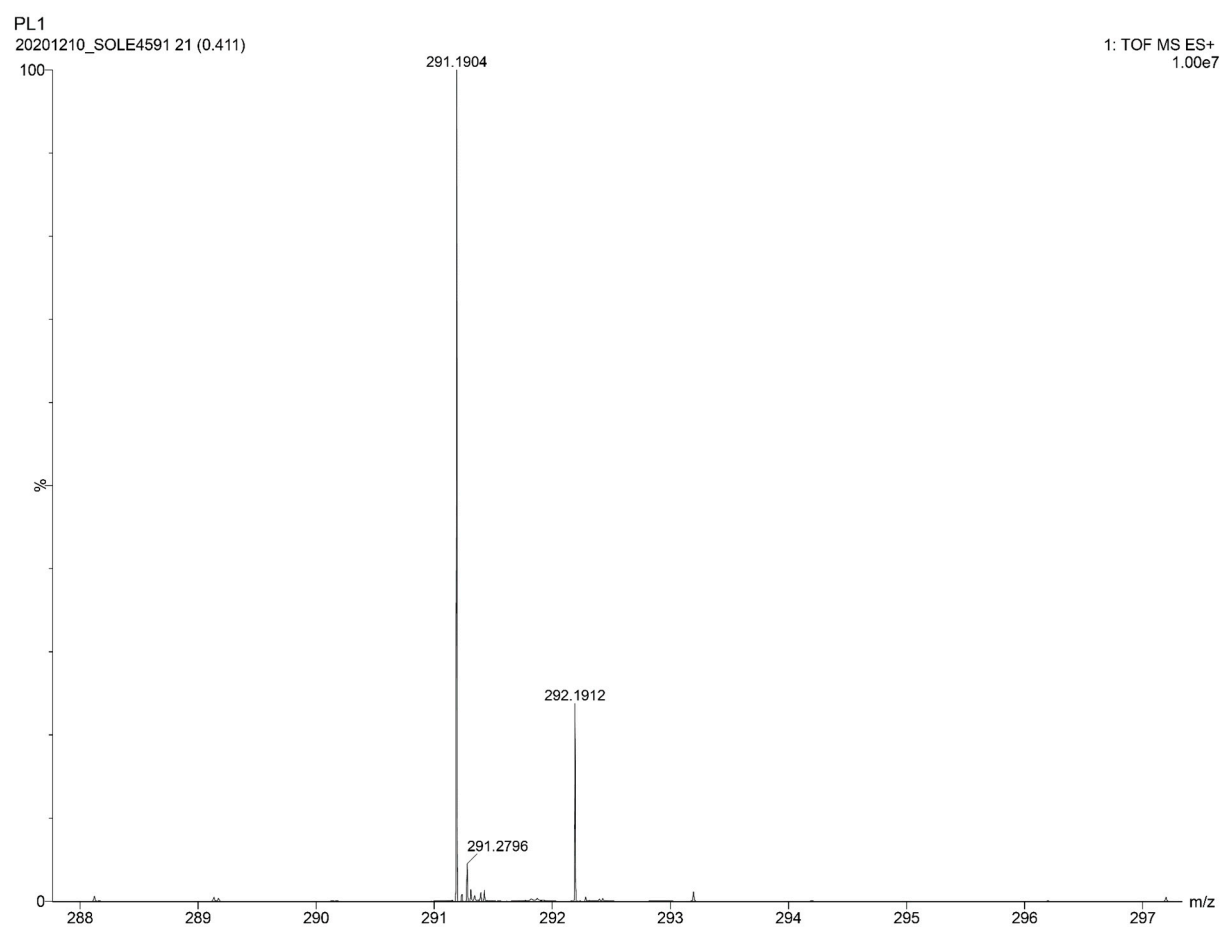

## (-)-PL2

Ion mass = 305.2009120

Charge = +1

| #                                      | C  | H  | N  | mass        | DBE  | error     |
|----------------------------------------|----|----|----|-------------|------|-----------|
| *** Mass Analysis for mass 305.2009120 |    |    |    |             |      |           |
| 1                                      | 21 | 25 | 2  | 305.2012252 | 10.5 | 3.132e-04 |
| 2                                      | 13 | 23 | 9  | 305.2070932 | 7.0  | 6.181e-03 |
| 3                                      | 12 | 21 | 10 | 305.1945171 | 7.5  | 6.395e-03 |
| 4                                      | 20 | 23 | 3  | 305.1886492 | 11.0 | 1.226e-02 |
| 5                                      | 22 | 27 | 1  | 305.2138013 | 10.0 | 1.289e-02 |
| 6                                      | 14 | 25 | 8  | 305.2196693 | 6.5  | 1.876e-02 |
| 7                                      | 19 | 21 | 4  | 305.1760731 | 11.5 | 2.484e-02 |
| 8                                      | 15 | 27 | 7  | 305.2322453 | 6.0  | 3.133e-02 |
| 9                                      | 18 | 19 | 5  | 305.1634971 | 12.0 | 3.741e-02 |
| 10                                     | 16 | 29 | 6  | 305.2448214 | 5.5  | 4.391e-02 |

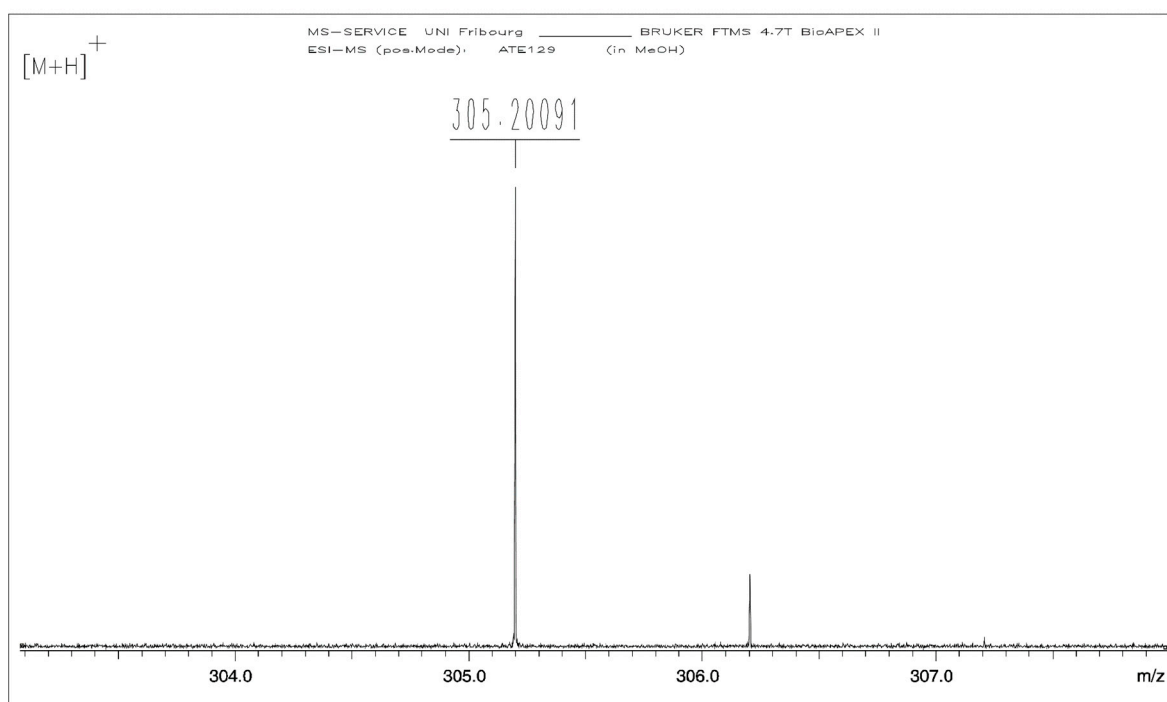

# **(-)-HL1**

XMASS Mass Analysis for /Data/UNI\_FR/SOLE2553\_ESI/2/pdata/1/massanal.res:  
XMASS Mass Analysis Constraints

**Ion mass = 309.1595820**

**Charge = +1**

| #                                      | C  | H  | N | O | mass        | DBE  | error     |
|----------------------------------------|----|----|---|---|-------------|------|-----------|
| *** Mass Analysis for mass 309.1595820 |    |    |   |   |             |      |           |
| 1                                      | 19 | 21 | 2 | 2 | 309.1597543 | 10.5 | 1.723e-04 |
| 2                                      | 5  | 23 | 7 | 8 | 309.1602622 | -2.0 | 6.802e-04 |
| 3                                      | 17 | 19 | 5 | 1 | 309.1584117 | 11.0 | 1.170e-03 |
| 4                                      | 7  | 25 | 4 | 9 | 309.1616048 | -2.5 | 2.023e-03 |
| 5                                      | 16 | 23 | 1 | 5 | 309.1570743 | 6.0  | 2.508e-03 |
| 6                                      | 8  | 21 | 8 | 5 | 309.1629422 | 2.5  | 3.360e-03 |
| 7                                      | 14 | 21 | 4 | 4 | 309.1557316 | 6.5  | 3.850e-03 |
| 8                                      | 10 | 23 | 5 | 6 | 309.1642849 | 2.0  | 4.703e-03 |
| 9                                      | 12 | 19 | 7 | 3 | 309.1543889 | 7.0  | 5.193e-03 |
| 10                                     | 11 | 19 | 9 | 2 | 309.1656223 | 7.0  | 6.040e-03 |

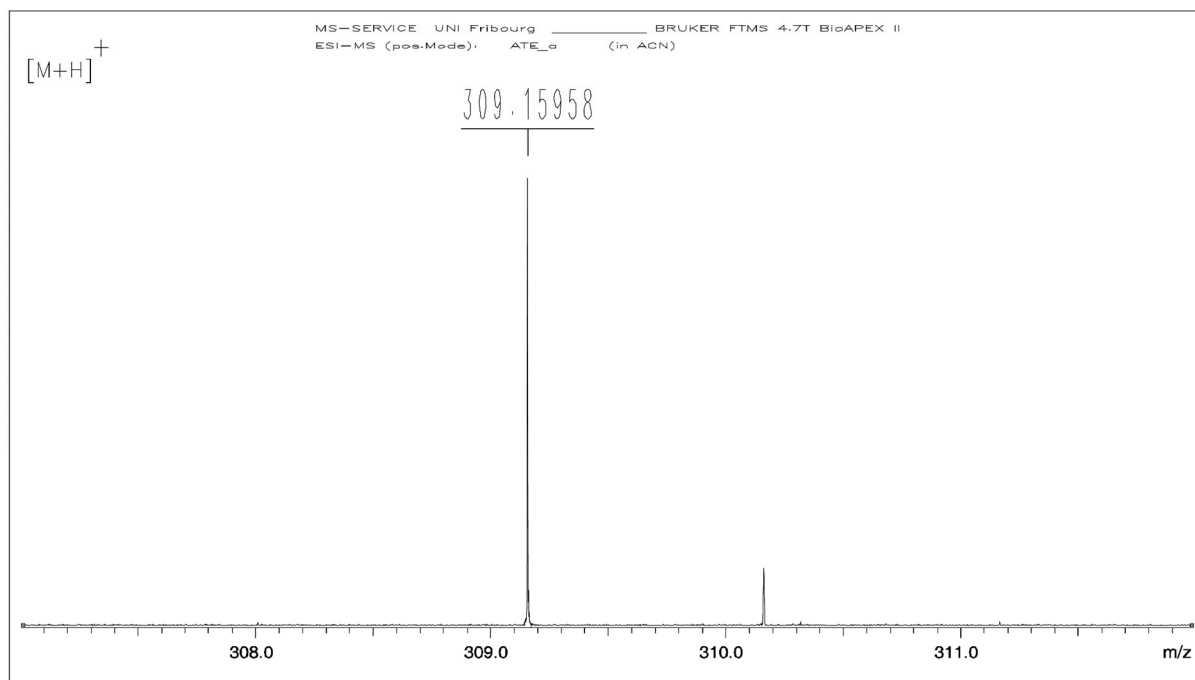

/Data/UNI FR/SOLE2553 ESI/2/pdata/1 FTMS USER Fri Jan 27 14:37:15 2017

**(-)-HL2**

| Mass     | Calc. Mass | mDa   | PPM   | DBE  | Formula       |
|----------|------------|-------|-------|------|---------------|
| 323.1773 | 323.1760   | 1.3   | 4.0   | 10.5 | C20 H23 N2 O2 |
|          | 323.1818   | -4.5  | -13.9 | 1.5  | C13 H27 N2 O7 |
|          | 323.1719   | 5.4   | 16.7  | 6.5  | C15 H23 N4 O4 |
|          | 323.1872   | -9.9  | -30.6 | 10.5 | C19 H23 N4 O  |
|          | 323.1931   | -15.8 | -48.9 | 1.5  | C12 H27 N4 O6 |
|          | 323.1607   | 16.6  | 51.4  | 6.5  | C16 H23 N2 O5 |
|          | 323.1971   | -19.8 | -61.3 | 5.5  | C17 H27 N2 O4 |
|          | 323.1567   | 20.6  | 63.7  | 2.5  | C11 H23 N4 O7 |
|          | 323.1508   | 26.5  | 82.0  | 11.5 | C18 H19 N4 O2 |
|          | 323.2083   | -31.0 | -95.9 | 5.5  | C16 H27 N4 O3 |

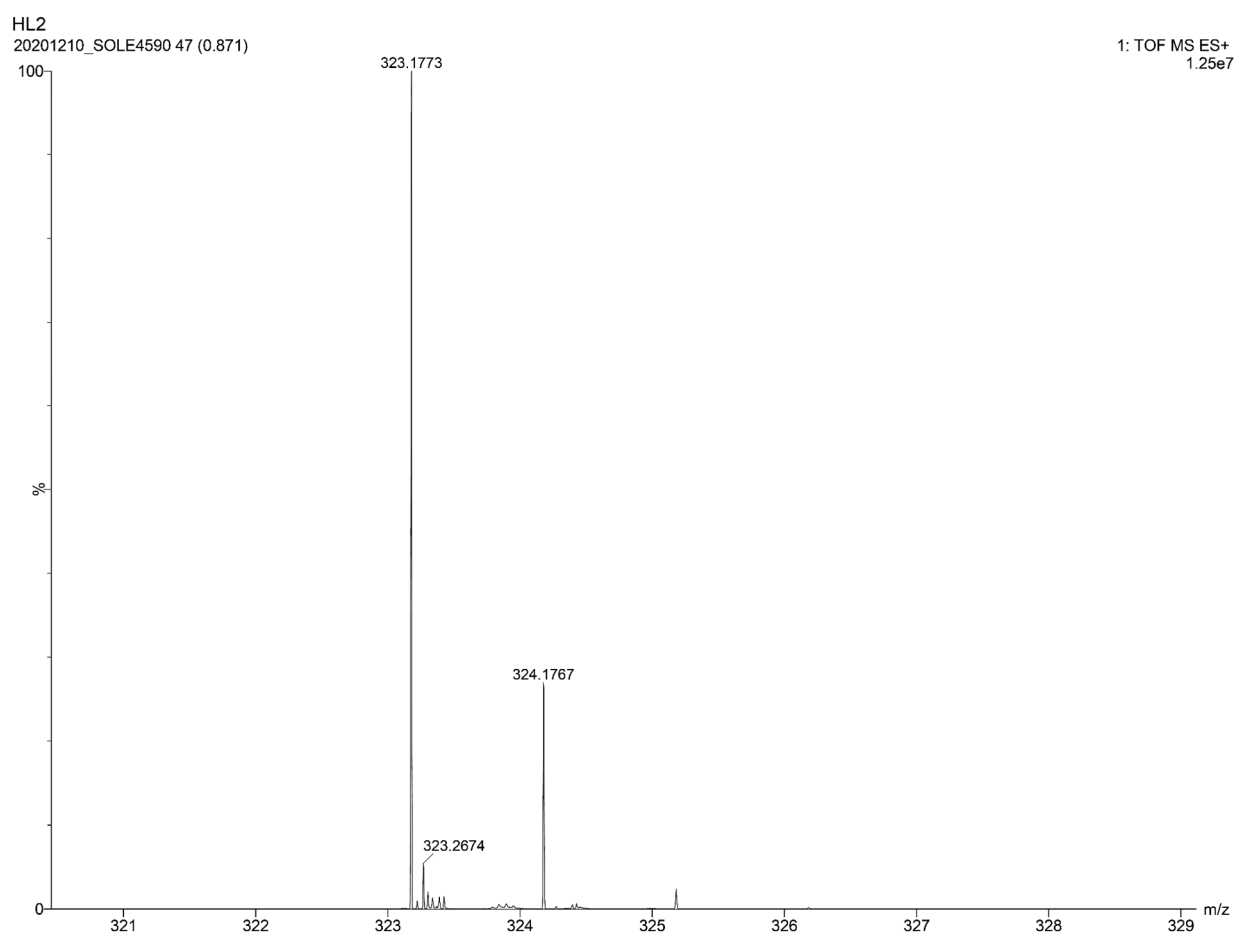

**[La{(-)-L1}<sub>2</sub>](ClO<sub>4</sub>)**

| Mass     | Calc. Mass | mDa   | PPM   | DBE  | Formula          |
|----------|------------|-------|-------|------|------------------|
| 753.1742 | 753.1745   | -0.3  | -0.4  | 27.5 | C41 H34 N4 O2 La |
|          | 753.1844   | -10.2 | -13.5 | 22.5 | C39 H38 N2 O5 La |
|          | 753.1633   | 10.9  | 14.5  | 27.5 | C42 H34 N2 O3 La |
|          | 753.1957   | -21.5 | -28.5 | 22.5 | C38 H38 N4 O4 La |
|          | 753.1997   | -25.5 | -33.9 | 26.5 | C43 H38 N2 O2 La |
|          | 753.1480   | 26.2  | 34.8  | 23.5 | C38 H34 N2 O6 La |
|          | 753.1422   | 32.0  | 42.5  | 32.5 | C45 H30 N2 O La  |
|          | 753.1381   | 36.1  | 47.9  | 28.5 | C40 H30 N4 O3 La |
|          | 753.2109   | -36.7 | -48.7 | 26.5 | C42 H38 N4 O La  |
|          | 753.2208   | -46.6 | -61.9 | 21.5 | C40 H42 N2 O4 La |

ATE446

20201210\_SOLE4604 52 (0.955)

1: TOF MS ES+  
5.81e4

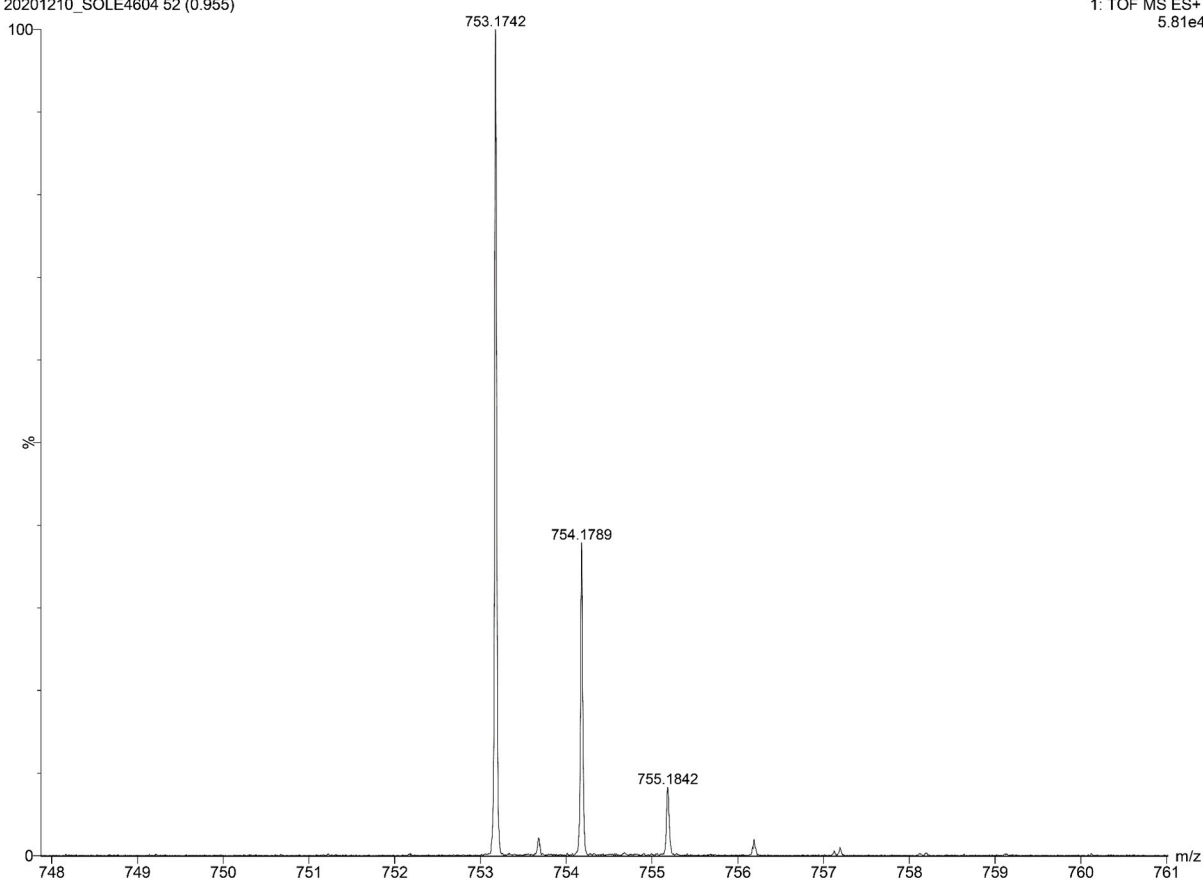

**[Eu{(-)-L1}<sub>2</sub>](ClO<sub>4</sub>)**

| Mass     | Calc. Mass | mDa   | PPM   | DBE  | Formula             |
|----------|------------|-------|-------|------|---------------------|
| 765.1841 | 765.1880   | -3.9  | -5.1  | 27.5 | C41 H34 N4 O2 151Eu |
|          | 765.1768   | 7.3   | 9.5   | 27.5 | C42 H34 N2 O3 151Eu |
|          | 765.1979   | -13.8 | -18.0 | 22.5 | C39 H38 N2 O5 151Eu |
|          | 765.1615   | 22.6  | 29.5  | 23.5 | C38 H34 N2 O6 151Eu |
|          | 765.2092   | -25.1 | -32.8 | 22.5 | C38 H38 N4 O4 151Eu |
|          | 765.1557   | 28.4  | 37.1  | 32.5 | C45 H30 N2 O 151Eu  |
|          | 765.2132   | -29.1 | -38.0 | 26.5 | C43 H38 N2 O2 151Eu |
|          | 765.1516   | 32.5  | 42.5  | 28.5 | C40 H30 N4 O3 151Eu |
|          | 765.2244   | -40.3 | -52.7 | 26.5 | C42 H38 N4 O 151Eu  |
|          | 765.1404   | 43.7  | 57.1  | 28.5 | C41 H30 N2 O4 151Eu |

ATE448  
20201210\_SOLE4605 70 (1.279)

1: TOF MS ES+  
1.38e5

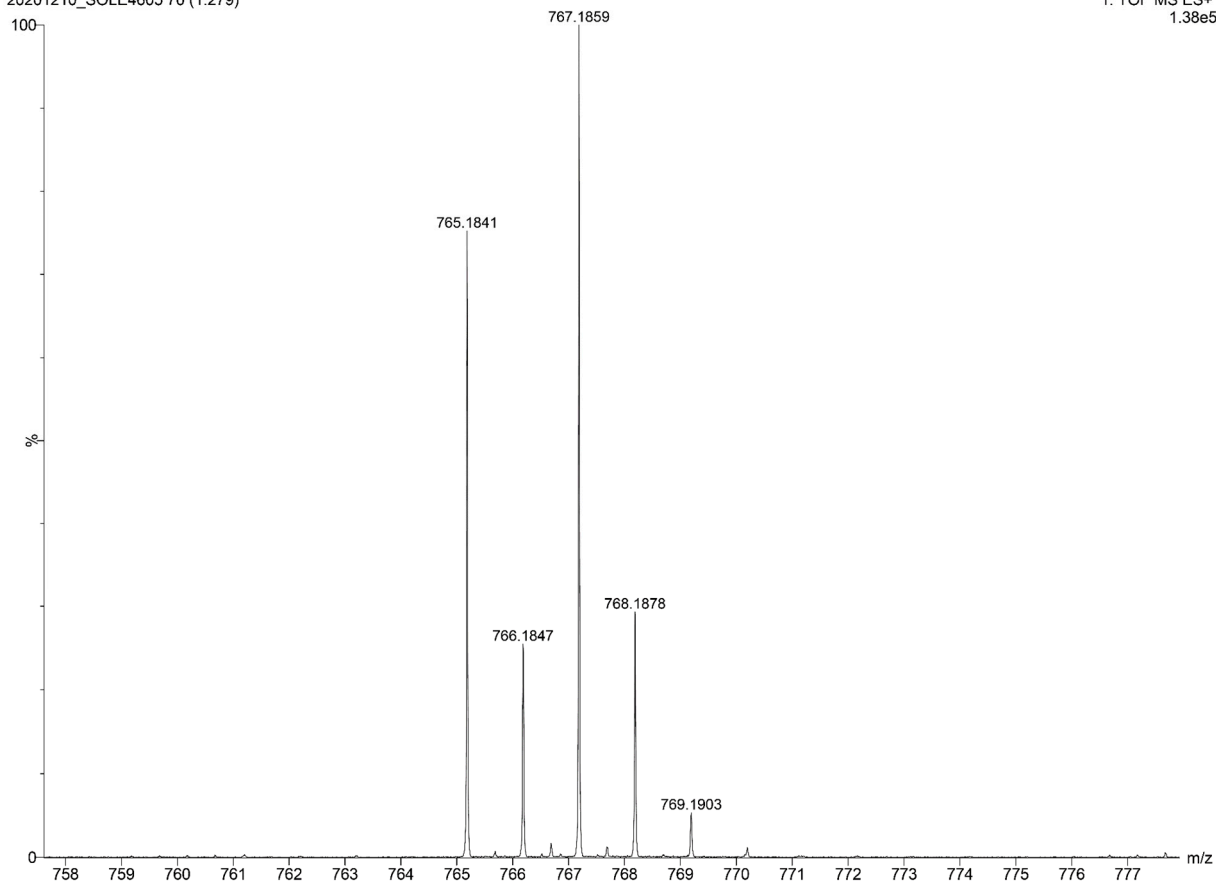

# [Lu{(-)-L1}<sub>2</sub>](ClO<sub>4</sub>)

| Mass     | Calc. Mass | mDa   | PPM   | DBE  | i-FIT  | Norm  | Conf(%) | Formula           |
|----------|------------|-------|-------|------|--------|-------|---------|-------------------|
| 789.2283 | 789.2301   | -1.8  | -2.3  | 22.5 | 1434.0 | 4.164 | 1.55    | C38 H38 N4 O4 Lu  |
|          | 789.2247   | 3.6   | 4.6   | 13.5 | 1432.0 | 2.195 | 11.14   | C32 H42 N2 O10 Lu |
|          | 789.2341   | -5.8  | -7.3  | 26.5 | 1436.6 | 6.843 | 0.11    | C43 H38 N2 O2 Lu  |
|          | 789.2359   | -7.6  | -9.6  | 13.5 | 1432.0 | 2.243 | 10.61   | C31 H42 N4 O9 Lu  |
|          | 789.2188   | 9.5   | 12.0  | 22.5 | 1434.6 | 4.793 | 0.83    | C39 H38 N2 O5 Lu  |
|          | 789.2400   | -11.7 | -14.8 | 17.5 | 1432.3 | 2.528 | 7.98    | C36 H42 N2 O7 Lu  |
|          | 789.2148   | 13.5  | 17.1  | 18.5 | 1430.6 | 0.819 | 44.08   | C34 H38 N4 O7 Lu  |
|          | 789.2453   | -17.0 | -21.5 | 26.5 | 1436.2 | 6.392 | 0.17    | C42 H38 N4 O Lu   |
|          | 789.2089   | 19.4  | 24.6  | 27.5 | 1435.8 | 5.990 | 0.25    | C41 H34 N4 O2 Lu  |
|          | 789.2512   | -22.9 | -29.0 | 17.5 | 1431.2 | 1.457 | 23.29   | C35 H42 N4 O6 Lu  |

ATE450pp1  
20210119\_SOLE4643 97 (1.914) Cm (4:100)

1: TOF MS ES+  
1.05e8

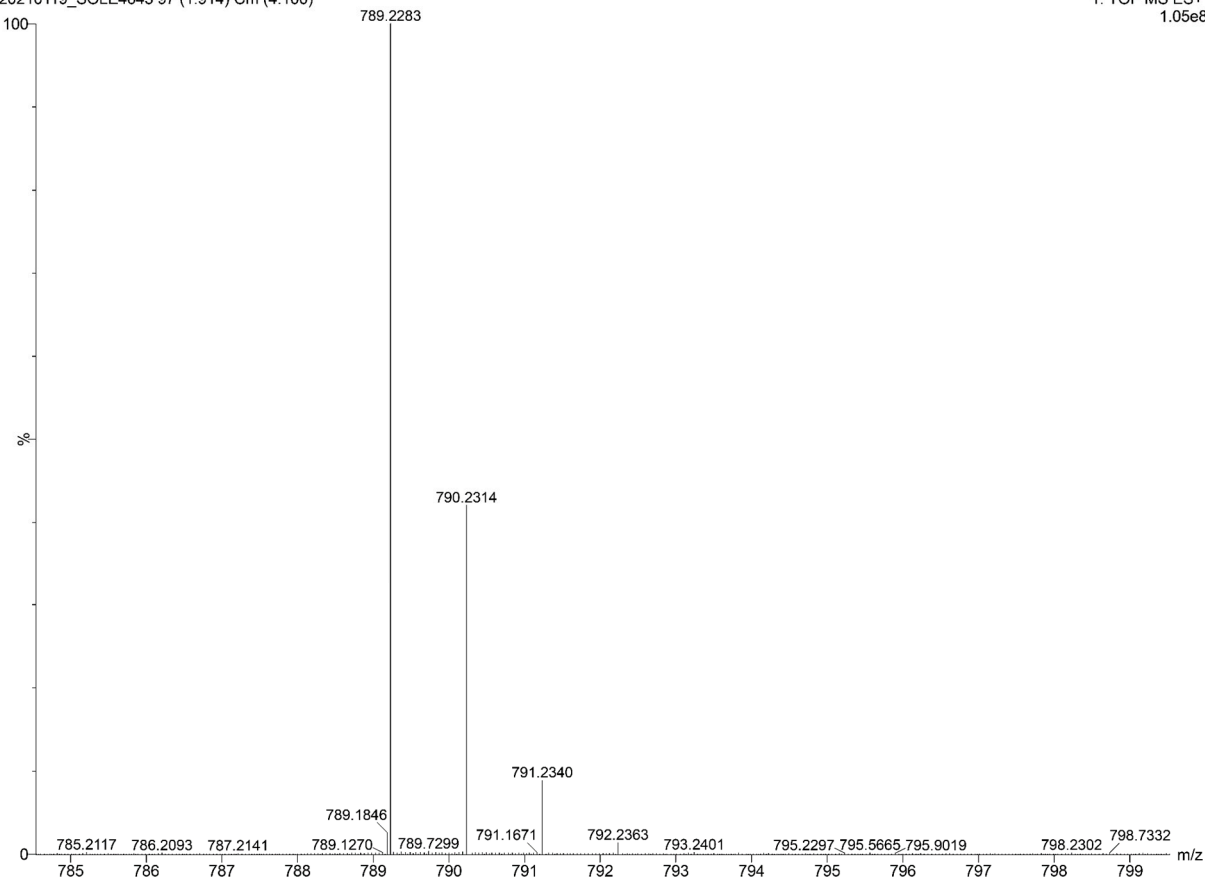

# [La{(-)-L2}<sub>2</sub>](ClO<sub>4</sub>)

| Mass     | Calc. Mass | mDa   | PPM   | DBE  | i-FIT  | Norm  | Conf (%) | Formula          |
|----------|------------|-------|-------|------|--------|-------|----------|------------------|
| 781.2243 | 781.2270   | -2.7  | -3.5  | 22.5 | 1755.2 | 3.667 | 2.55     | C40 H42 N4 O4 La |
|          | 781.2310   | -6.7  | -8.6  | 26.5 | 1758.6 | 7.094 | 0.08     | C45 H42 N2 O2 La |
|          | 781.2328   | -8.5  | -10.9 | 13.5 | 1758.1 | 6.621 | 0.13     | C33 H46 N4 O9 La |
|          | 781.2157   | 8.6   | 11.0  | 22.5 | 1755.7 | 4.192 | 1.51     | C41 H42 N2 O5 La |
|          | 781.2117   | 12.6  | 16.1  | 18.5 | 1755.4 | 3.866 | 2.09     | C36 H42 N4 O7 La |
|          | 781.2369   | -12.6 | -16.1 | 17.5 | 1751.9 | 0.333 | 71.66    | C38 H46 N2 O7 La |
|          | 781.2422   | -17.9 | -22.9 | 26.5 | 1758.4 | 6.913 | 0.10     | C44 H42 N4 O La  |
|          | 781.2058   | 18.5  | 23.7  | 27.5 | 1757.9 | 6.371 | 0.17     | C43 H38 N4 O2 La |
|          | 781.2481   | -23.8 | -30.5 | 17.5 | 1753.2 | 1.718 | 17.95    | C37 H46 N4 O6 La |
|          | 781.2005   | 23.8  | 30.5  | 18.5 | 1754.8 | 3.284 | 3.75     | C37 H42 N2 O8 La |

ATE169

20210119\_SOLE4646 18 (0.380) Cm (4:100)

1: TOF MS ES+  
5.83e8

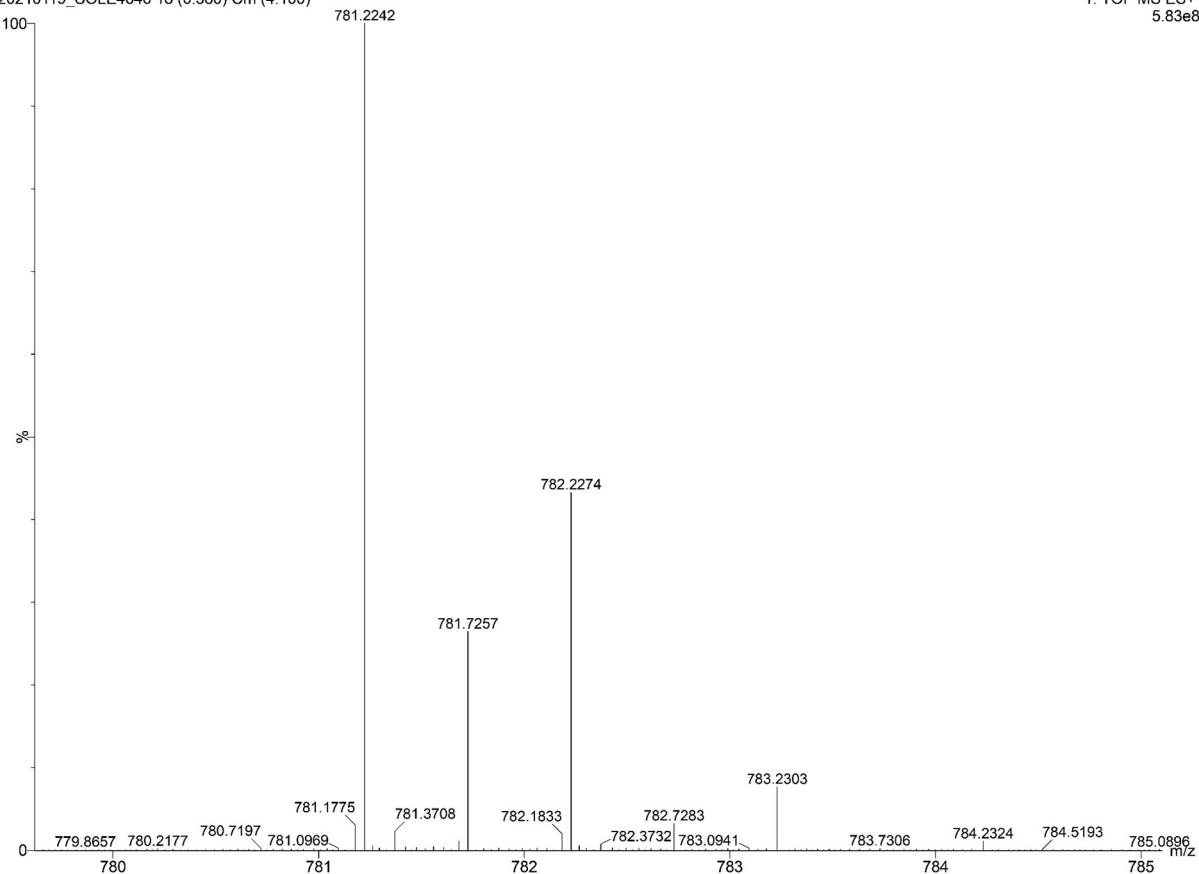

**[Eu{(-)-L2}<sub>2</sub>](ClO<sub>4</sub>)**

| Mass     | Calc. Mass | mDa   | PPM   | DBE  | Formula |     |    |    |       |
|----------|------------|-------|-------|------|---------|-----|----|----|-------|
| 793.2206 | 793.2193   | 1.3   | 1.6   | 27.5 | C43     | H38 | N4 | O2 | 151Eu |
|          | 793.2292   | -8.6  | -10.8 | 22.5 | C41     | H42 | N2 | O5 | 151Eu |
|          | 793.2081   | 12.5  | 15.8  | 27.5 | C44     | H38 | N2 | O3 | 151Eu |
|          | 793.2041   | 16.5  | 20.8  | 23.5 | C39     | H38 | N4 | O5 | 151Eu |
|          | 793.2405   | -19.9 | -25.1 | 22.5 | C40     | H42 | N4 | O4 | 151Eu |
|          | 793.2445   | -23.9 | -30.1 | 26.5 | C45     | H42 | N2 | O2 | 151Eu |
|          | 793.1928   | 27.8  | 35.0  | 23.5 | C40     | H38 | N2 | O6 | 151Eu |
|          | 793.2503   | -29.7 | -37.4 | 17.5 | C38     | H46 | N2 | O7 | 151Eu |
|          | 793.1870   | 33.6  | 42.4  | 32.5 | C47     | H34 | N2 | O  | 151Eu |
|          | 793.2557   | -35.1 | -44.2 | 26.5 | C44     | H42 | N4 | O  | 151Eu |

ATE444

20201210\_SOLE4608 17 (0.324)

1: TOF MS ES+  
1.02e5

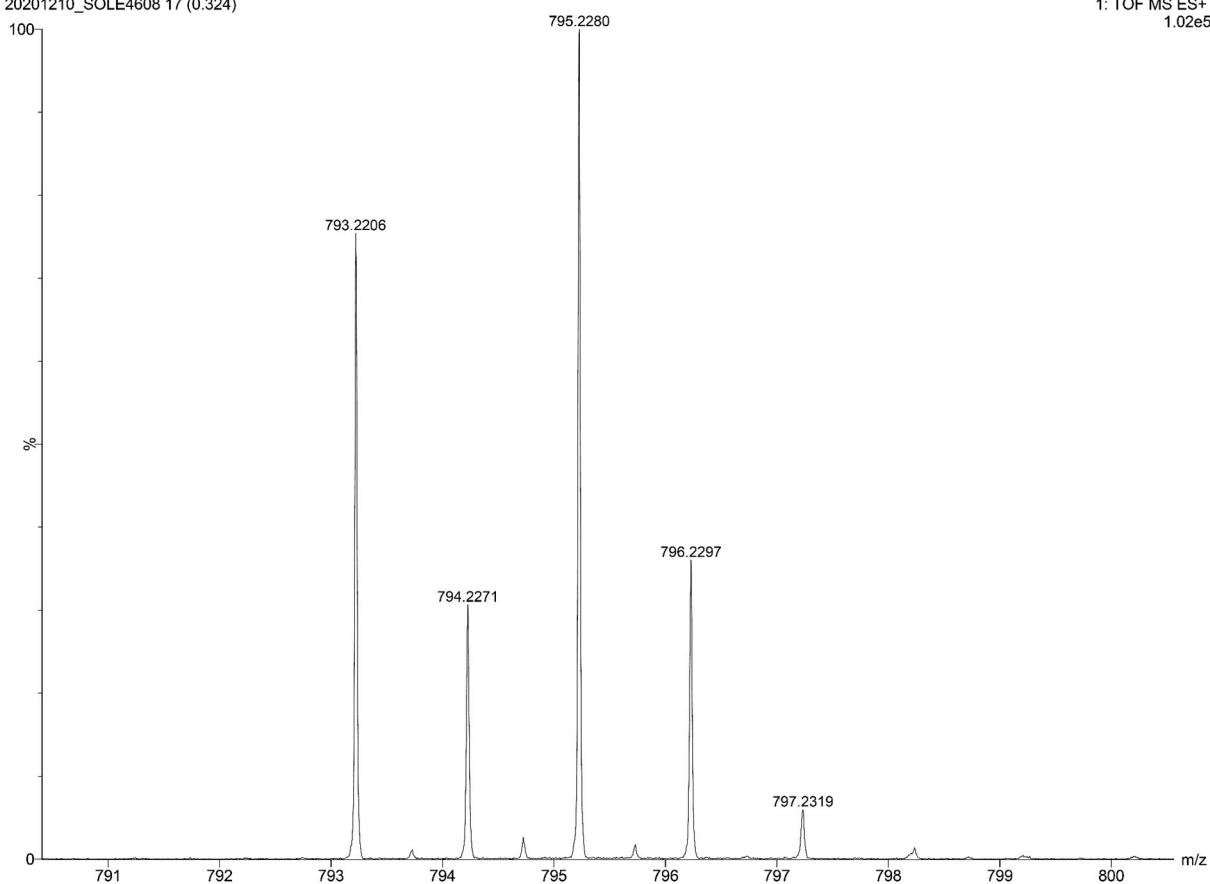

# **[Lu{(-)-L2<sub>2</sub>}(ClO<sub>4</sub>)**

| Mass     | Calc. Mass | mDa   | PPM   | DBE  | Formula          |
|----------|------------|-------|-------|------|------------------|
| 817.2593 | 817.2614   | -2.1  | -2.6  | 22.5 | C40 H42 N4 O4 Lu |
|          | 817.2654   | -6.1  | -7.5  | 26.5 | C45 H42 N2 O2 Lu |
|          | 817.2501   | 9.2   | 11.3  | 22.5 | C41 H42 N2 O5 Lu |
|          | 817.2713   | -12.0 | -14.7 | 17.5 | C38 H46 N2 O7 Lu |
|          | 817.2766   | -17.3 | -21.2 | 26.5 | C44 H42 N4 O Lu  |
|          | 817.2402   | 19.1  | 23.4  | 27.5 | C43 H38 N4 O2 Lu |
|          | 817.2865   | -27.2 | -33.3 | 21.5 | C42 H46 N2 O4 Lu |
|          | 817.2290   | 30.3  | 37.1  | 27.5 | C44 H38 N2 O3 Lu |
|          | 817.2250   | 34.3  | 42.0  | 23.5 | C39 H38 N4 O5 Lu |
|          | 817.2978   | -38.5 | -47.1 | 21.5 | C41 H46 N4 O3 Lu |

ATE442

20201210\_SOLE4606 37 (0.702)

1: TOF MS ES+  
1.95e4

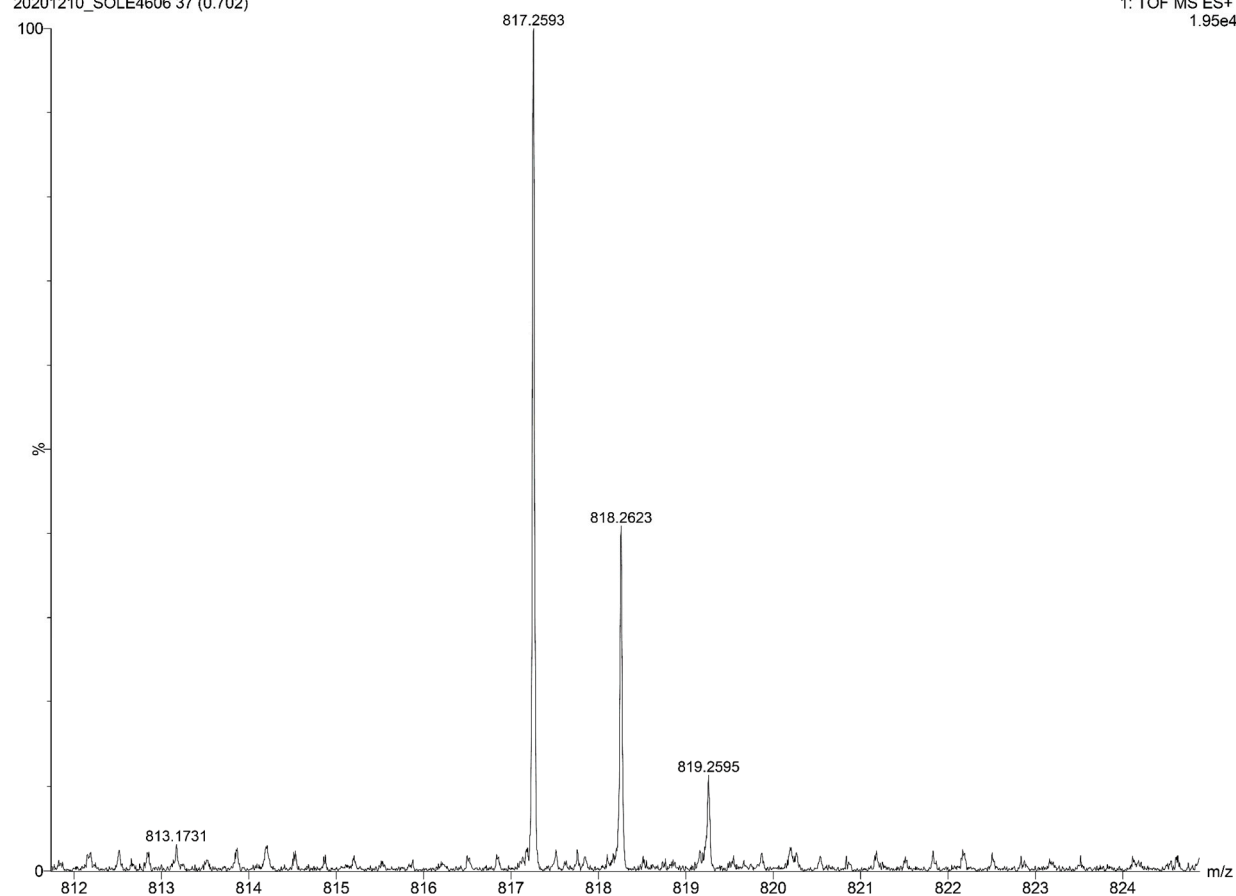

## **X-Ray tables**

|             | <b>(-)-PL1</b> | <b>(-)-HL1</b> | <b>(-)-HL2</b> |
|-------------|----------------|----------------|----------------|
| CCDC number | 2084719        | 2084720        | 2084721        |

|                                                     |                                                                    |                                                                    |                                                                    |
|-----------------------------------------------------|--------------------------------------------------------------------|--------------------------------------------------------------------|--------------------------------------------------------------------|
| Empirical formula                                   | C <sub>20</sub> H <sub>22</sub> N <sub>2</sub>                     | C <sub>19</sub> H <sub>20</sub> N <sub>2</sub> O <sub>2</sub>      | C <sub>40</sub> H <sub>44</sub> N <sub>4</sub> O <sub>4</sub>      |
| Form. weight (g.mol <sup>-1</sup> )                 | 290.39                                                             | 308.37                                                             | 644.79                                                             |
| Temperature (K)                                     | 250(2)                                                             | 200(2)                                                             | 250(2)                                                             |
| Wavelength (Å)                                      | 0.71073                                                            | 1.54186                                                            | 0.71073                                                            |
| Crystal system                                      | Orthorhombic                                                       | Orthorhombic                                                       | Monoclinic                                                         |
| Space group                                         | <i>P</i> 2 <sub>1</sub> 2 <sub>1</sub> 2 <sub>1</sub>              | <i>P</i> 2 <sub>1</sub> 2 <sub>1</sub> 2 <sub>1</sub>              | <i>P</i> 2 <sub>1</sub>                                            |
| <i>a</i> (Å)                                        | 7.2613(5)                                                          | 6.50130(10)                                                        | 11.3097(8)                                                         |
| <i>b</i> (Å)                                        | 9.0056(6)                                                          | 10.1527(3)                                                         | 6.2574(5)                                                          |
| <i>c</i> (Å)                                        | 25.277(2)                                                          | 24.2770(5)                                                         | 24.2538(19)                                                        |
| $\beta$ (°)                                         | 90                                                                 | 90                                                                 | 95.828(6)                                                          |
| Volume (Å <sup>3</sup> )                            | 1652.9(2)                                                          | 1602.42(6)                                                         | 1707.6(2)                                                          |
| <i>Z</i>                                            | 4                                                                  | 4                                                                  | 2                                                                  |
| Density (calc.) (g/mm <sup>3</sup> )                | 1.167                                                              | 1.278                                                              | 1.254                                                              |
| Abs. coef. (mm <sup>-1</sup> )                      | 0.068                                                              | 0.668                                                              | 0.082                                                              |
| <i>F</i> (000)                                      | 624                                                                | 656.0                                                              | 688.0                                                              |
| Theta range for data collection                     | 1.611 to 25.125°                                                   | 14.102 to 137.64                                                   | 3.376 to 50.516                                                    |
| Reflections collected                               | 21498                                                              | 16497                                                              | 5874                                                               |
| Independent reflections                             | 2947<br>[ <i>R</i> <sub>int</sub> = 0.1080]                        | 2908<br>[ <i>R</i> <sub>int</sub> = 0.0181]                        | 5874<br>[Twinning: 0.732(6)]                                       |
| Data / restraints / parameters                      | 2947 / 0 / 202                                                     | 2908/0/211                                                         | 5874/1/441                                                         |
| Goodness-of-fit on <i>F</i> <sup>2</sup>            | 0.923                                                              | 1.045                                                              | 1.076                                                              |
| Final <i>R</i> indices [ <i>I</i> > 2σ( <i>I</i> )] | <i>R</i> <sub>1</sub> = 0.0400<br>w <i>R</i> <sub>2</sub> = 0.0698 | <i>R</i> <sub>1</sub> = 0.0317<br>w <i>R</i> <sub>2</sub> = 0.0790 | <i>R</i> <sub>1</sub> = 0.0896<br>w <i>R</i> <sub>2</sub> = 0.2301 |
| <i>R</i> indices (all data)                         | <i>R</i> <sub>1</sub> = 0.0965<br>w <i>R</i> <sub>2</sub> = 0.0850 | <i>R</i> <sub>1</sub> = 0.0343<br>w <i>R</i> <sub>2</sub> = 0.0805 | <i>R</i> <sub>1</sub> = 0.1079<br>w <i>R</i> <sub>2</sub> = 0.2532 |
| Largest diff. peak and hole (e.Å <sup>-3</sup> )    | 0.139/-0.124                                                       | 0.20/-0.20                                                         | 0.39/-0.32                                                         |
